# Supplementary material
Source: PubMed Central journal article supplement (PMC4184034)
Supplement: NIHMS628316-supplement-Supplementary_Materials.pdf [file NIHMS628316-supplement-Supplementary_Materials.pdf]

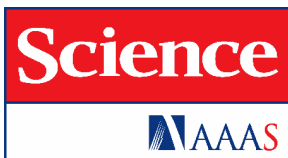

Supplementary Materials for  
**Structures of Cas9 Endonucleases Reveal RNA-Mediated  
Conformational Activation**

Martin Jinek,\* Fuguo Jiang, David W. Taylor, Samuel H. Sternberg, Emine Kaya, Enbo Ma, Carolin Anders, Michael Hauer, Kaihong Zhou, Steven Lin, Matias Kaplan, Anthony T. Iavarone, Emmanuelle Charpentier, Eva Nogales,\* Jennifer A. Doudna\*

\*Corresponding author. E-mail: jinek@bioc.uzh.ch (M.J.); enogales@lbl.gov (E.N.);  
doudna@berkeley.edu (J.A.D.)

Published 6 February 2014 on *Science* Express  
DOI: 10.1126/science.1247997

**This PDF file includes:**

Materials and Methods

Figs. S1 to S21

Tables S1 and S2

References

## Materials and Methods

### SpyCas9 expression and purification

*Streptococcus pyogenes* Cas9 (SpyCas9) was cloned into a custom pET-based expression vector encoding an N-terminal His<sub>6</sub>-tag followed by Maltose-Binding Protein (MBP) and a TEV protease cleavage site (8). Point mutations were introduced into SpyCas9 using site-directed mutagenesis and verified by DNA sequencing.

For crystallization, wild-type (WT) and K848C mutant SpyCas9 proteins were expressed and purified essentially as described (8). The protein was purified by a combination of Ni-NTA affinity, cation exchange (SP sepharose) and gel filtration (Superdex 200) chromatography steps. The final gel filtration step was carried out in elution buffer containing 20 mM HEPES-KOH pH 7.5, 250 mM KCl and 1 mM TCEP. The protein was concentrated to 4-6 mg ml<sup>-1</sup> and flash frozen in liquid N<sub>2</sub>. Selenomethionine (SeMet)-substituted SpyCas9 was expressed as described (62) and purified as for native SpyCas9, except that all chromatographic solutions were supplemented with 5 mM TCEP.

For crosslinking and biochemical assays, WT and mutant SpyCas9 proteins were expressed as His<sub>10</sub>-MBP-TEV fusions and purified as described (8), with the following modifications: All buffers contained 20 mM Tris-Cl pH 7.5, 5% glycerol, and 1 mM TCEP. The NaCl concentration was maintained at 500 mM during Ni-NTA chromatography and overnight dialysis with TEV protease. In order to remove TEV protease, His<sub>10</sub>-MBP, and any uncleaved His<sub>10</sub>-MBP-SpyCas9, the TEV-treated protein sample was run over Ni-NTA agarose resin again. SpyCas9 was dialyzed into Buffer A (20 mM Tris-Cl pH 7.5, 125 mM KCl, 5% glycerol, 1 mM TCEP) for 3 h at 4°C, and then applied onto a 5 ml HiTrap SP HP sepharose column (GE Healthcare). After washing with three column volumes of Buffer A, SpyCas9 was eluted using a linear gradient from 0-100% Buffer B (20 mM Tris-Cl pH 7.5, 1 M KCl, 5% glycerol, 1 mM TCEP) over 20 column volumes. The protein was further purified by gel filtration chromatography on a Superdex 200 16/60 column (GE Healthcare) in SpyCas9 Storage Buffer (20 mM Tris-Cl pH 7.5, 200 mM KCl, 5% glycerol, 1 mM TCEP).

## SpyCas9 crystallization and structure determination

SpyCas9 crystals were grown using the hanging drop vapor diffusion method at 20 °C by mixing equal volumes (1.5  $\mu$ l + 1.5  $\mu$ l) of protein solution and crystallization buffer (0.1 M Tris-Cl pH 8.5, 0.2-0.3 M Li<sub>2</sub>SO<sub>4</sub> and 14-15% (w/v) PEG 3350). Crystal nucleation and growth was gradually improved using iterative microseeding. For diffraction experiments, the crystals were cryoprotected in situ by stepwise exchange into a solution containing 0.1 M Tris-Cl pH 8.5, 0.1 M Li<sub>2</sub>SO<sub>4</sub>, 35% (w/v) PEG 3350, and 10% ethylene glycol in five steps executed at 5 min intervals. In each step, 0.5  $\mu$ l of mother liquor was removed from the crystal drop and replaced with 0.5  $\mu$ l cryoprotectant. After the final cryoprotectant addition, the crystals were incubated for an additional 5 min, transferred to a drop containing 100% cryoprotectant for 30 s, and then flash cooled in liquid N<sub>2</sub>. Diffraction data were measured at beamlines 8.2.1 and 8.2.2 of the Advanced Light Source (Lawrence Berkeley National Laboratory), and beamlines PXI and PXIII of the Swiss Light Source (Paul Scherrer Institute) and processed using XDS (49). Data collection statistics are shown in Table 1. The crystals belonged to space group *P*2<sub>1</sub>2<sub>1</sub>2 and contained two molecules of SpyCas9 in the asymmetric unit related by pseudotranslational, non-crystallographic symmetry. High-resolution native data to 2.62 Å resolution were measured from an unusually large crystal cryoprotected in the presence of 1 mM MgCl<sub>2</sub>. A complete native data set was obtained by collecting four datasets (40° rotation per dataset) from different exposed parts of the crystal.

Phasing was performed as follows. A 4.2 Å resolution single-wavelength anomalous diffraction (SAD) dataset was measured at the selenium peak wavelength using a SeMet-substituted SpyCas9 crystal. However, due to small crystal size and low resolution, the anomalous signal in this dataset was too weak to locate the selenium sites. Additional phases were therefore obtained from SpyCas9 crystals soaked in sodium tungstate. The crystals were soaked by stepwise exchange of the lithium sulfate containing mother liquor with 0.1 M Tris-Cl pH 8.5, 0.1 M Na<sub>2</sub>WO<sub>4</sub>, 15% (w/v) PEG 3350, and then cryoprotected by stepwise exchange (as described above) of the soak solution with cryoprotectant solution supplemented with 10 mM Na<sub>2</sub>WO<sub>4</sub>. Using these crystals, a highly redundant SAD 3.9 Å dataset was measured at the tungsten L-III absorption edge (1.2149 Å), and 16 tungstate sites were located using SHELXD (63). Further phase information came from peak-wavelength SAD datasets obtained from a crystal of SpyCas9 K848C mutant soaked in 1 mM thimerosal for 6 hr prior to cryoprotection

(thimerosal soak), a WT SpyCas9 crystal soaked with 10 mM CoCl<sub>2</sub> during the cryoprotection procedure (Co soak), and a WT SpyCas9 crystal grown in the presence of 1 mM Er(III)-acetate. Refinement of the substructures and phase calculations were performed using the MIRAS procedure in AutoSHARP (50) by combining initial tungstate SAD phases with the additional SAD data sets (SeMet, Co, Er and thimerosal) and the high-resolution native data. Phases were improved by density modification and two-fold non-crystallographic symmetry averaging using the Resolve module of the Phenix suite (51, 64). The resulting electron density maps were of excellent quality and allowed manual model building in COOT (52, 65). Selenium positions aided in assigning the sequence register. The atomic model of SpyCas9 was completed by iterative model building in COOT and refinement using Phenix.refine (53). Refinement and model statistics are provided in Table 1.

The final atomic model has  $R_{\text{work}}$  and  $R_{\text{free}}$  values of 0.253 and 0.286, respectively, and good stereochemistry, as assessed with MolProbity (66), with 96.6% of the residues in the most favored regions of the Ramachandran plot and no outliers. The model contains two SpyCas9 molecules that superimpose with an overall rmsd of 1.1 Å over 1060 C $\alpha$  atoms, the major difference being a  $\sim 5^\circ$  hinge-like rotation of the HNH domain. In the atomic model, molecule A contains residues 4-102, 115-307, 314-447, 503-527, 540-567, 587-672, 677-714, 718-764, 775-791, 799-859, 862-902, 908-1027, 1036-1102, 1137-1146, 1159-1186, 1192-1242, and 1259-1363. Molecule B contains residues 4-103, 116-308, 310-447, 502-527, 539-570, 587-673, 676-713, 718-764, 773-791, 800-859, 862-902, 908-1025, 1036-1102, 1137-1148, 1160-1185, 1188-1241, and 1256-1363. The remaining residues do not appear ordered in electron density maps and could not be built. In the manuscript, the discussion of the SpyCas9 structure is based on molecule B, which is better ordered.

An additional dataset (at 3.1 Å resolution) was measured using a SpyCas9 crystal soaked in 20 mM MnCl<sub>2</sub> during the cryoprotection procedure.  $F_o-F_c$  difference maps calculated using the high-resolution model revealed two Mn<sup>2+</sup> ions bound in the RuvC domain active site (fig. S3) and 4 additional Mn<sup>2+</sup> ions bound to each of the two SpyCas9 molecules. The HNH domain active site remained poorly ordered in this structure, and no Mn<sup>2+</sup> binding was observed. The model was refined to an  $R_{\text{work}}$  and  $R_{\text{free}}$  of 0.252 and 0.278, respectively.

## **Endonuclease cleavage assays with SpyCas9**

A synthetic 42-nt crRNA targeting a protospacer from the bacteriophage  $\lambda$  genome was purchased from Integrated DNA Technologies (IDT) and purified via 10% denaturing PAGE. tracrRNA was *in vitro* transcribed from a synthetic DNA template (IDT) using T7 RNA polymerase and corresponds to nucleotides 15-87 as described previously (8). crRNA:tracrRNA duplexes (10  $\mu$ M) were prepared by mixing equimolar amounts of crRNA and tracrRNA in Hybridization Buffer (20 mM Tris-Cl pH 7.5, 100 mM KCl, 5 mM MgCl<sub>2</sub>), heating at 95 °C for 30 sec, and slow-cooling on the benchtop. SpyCas9:RNA complexes were reconstituted by mixing SpyCas9 with a 2X molar excess of the crRNA:tracrRNA duplex in Reconstitution Buffer (20 mM Tris-Cl pH 7.5, 100 mM KCl, 5 mM MgCl<sub>2</sub>, 1 mM DTT) and incubating at 37°C for 10 minutes.

A 55 base-pair (bp) DNA target derived from the bacteriophage  $\lambda$  genome was prepared by mixing equimolar amounts of individual synthetic oligonucleotides (IDT) in Hybridization Buffer supplemented with 5% glycerol, heating for 1-2 minutes, and slow-cooling on the benchtop. Duplexes were separated from single-stranded DNA by 6% native PAGE conducted at 4°C, with 5 mM MgCl<sub>2</sub> added to the gel and the running buffer. The DNA was excised, eluted into 10 mM Tris-Cl, pH 8 at 4°C overnight, ethanol precipitated, and resuspended in Hybridization Buffer. Br-dU containing ssDNAs used in analytical crosslinking reactions were radiolabeled and hybridized with a 5X molar excess of the unlabeled complementary strand. Cleavage reactions were performed at room temperature in Reaction Buffer (20 mM Tris-Cl pH 7.5, 100 mM KCl, 5 mM MgCl<sub>2</sub>, 5% glycerol, 1 mM DTT) using 1 nM radiolabeled dsDNA substrates and 1 nM or 10 nM Cas9:RNA. Aliquots (10  $\mu$ l) were removed at various time points and quenched by mixing with an equal volume of formamide gel loading buffer supplemented with 50 mM EDTA. Cleavage products were resolved by 10% denaturing PAGE and visualized by phosphorimaging (GE Healthcare). The sequences of DNA and RNA oligonucleotides used in this study are listed in Supplementary Table S2.

## **Preparation of crosslinked peptide-DNA heteroconjugates for mass spectrometry**

200 pmol of catalytically inactive (D10A/H840A) Cas9 was reconstituted with crRNA:tracrRNA and incubated with a 10X molar excess of Br-dU containing dsDNA substrate for 30 min at room

temperature in Reaction Buffer. Reactions were transferred into the lid of open PCR tubes and irradiated with UV-light (308 nm) for 30 min at room temperature. Crosslinked samples were denatured with 6 M urea for 1 h at 65°C, diluted to 0.5 M urea with 25 mM ammonium bicarbonate, and digested with 1 ng trypsin overnight at room temperature. Samples were concentrated to a final volume of 50  $\mu$ L and desalted with Illustra MicroSpin G-25 Columns (GE Healthcare). Samples were then treated with 1,000 Units of Nuclease S1 (Sigma Aldrich) for 1 h at 37 °C in 30 mM ammonium acetate pH 5.7, 10 mM CaCl<sub>2</sub> and 0.1 mM ZnCl<sub>2</sub> in a total volume of 60  $\mu$ L. In order to remove remaining phosphate groups at the crosslink site, 7  $\mu$ L of 10X Antarctic Phosphatase buffer and 5 Units of Antarctic Phosphatase (New England BioLabs) were added to the reactions, and samples were incubated for an additional hour at 37 °C.

### **Liquid chromatography-tandem mass spectrometry (LS-MS/MS)**

Tryptic digests of crosslinked proteins were analyzed using a Dionex UltiMate3000 RSLCnano liquid chromatograph that was connected in-line with an LTQ Orbitrap XL mass spectrometer equipped with a nanoelectrospray ionization source (nanoESI; Thermo Fisher Scientific). The LC was equipped with a C18 analytical column (Acclaim® PepMap RSLC, 150 mm length  $\times$  0.075 mm inner diameter, 2  $\mu$ m particles, 100 Å pores, Thermo) and a 1  $\mu$ L sample loop. Solvent A was 99.9% water/0.1% formic acid and solvent B was 99.9% acetonitrile/0.1% formic acid (v/v). Samples were placed in polypropylene autosampler vials with septa caps (Wheaton,) and loaded into the autosampler compartment (maintained at 4 °C) prior to analysis. The elution program consisted of isocratic flow at 5% B for 4 min, a linear gradient to 35% B over 98 min, isocratic flow at 95% B for 6 min, and isocratic flow at 5% B for 12 min, at a flow rate of 300 nL min<sup>-1</sup>. The column exit was connected to the nanoESI emitter in the ion source of the mass spectrometer using polyimide-coated, fused-silica tubing (20  $\mu$ m inner diameter  $\times$  280  $\mu$ m outer diameter, Thermo).

Full-scan mass spectra were acquired in the positive ion mode over the range  $m/z = 350$  to 1500 using the Orbitrap mass analyzer, in profile format, with a mass resolution setting of 60,000 (at  $m/z = 400$ , measured at full width at half-maximum peak height). Under these conditions, isotopic distributions of singly and multiply charged peptide ions were resolved in the full-scan mass spectra. Thus, a precursor ion's mass and charge were determined independently, i.e. the ion charge was determined from the reciprocal of the spacing between

adjacent isotope peaks in the  $m/z$  spectrum. In the data-dependent mode, the six most intense ions exceeding an intensity threshold of 30,000 counts were selected from each full-scan mass spectrum for tandem mass spectrometry (MS/MS) analysis using collision-induced dissociation (CID). MS/MS spectra were acquired using the linear ion trap, in centroid format, with the following parameters: isolation width 3  $m/z$  units, normalized collision energy 28%, default charge state 2+, activation Q 0.25, and activation time 30 ms. Real-time charge state screening was enabled to exclude singly charged ions and unassigned charge states from MS/MS analysis. To avoid the occurrence of redundant MS/MS measurements, real-time dynamic exclusion was enabled to preclude re-selection of previously analyzed precursor ions, with the following parameters: repeat count 2, repeat duration 10 s, exclusion list size 500, exclusion duration 60 s, and exclusion mass width 20 ppm (relative to mass). Data were analyzed using Xcalibur (version 2.0.7 SP1, Thermo) and Proteome Discoverer (version 1.3, Thermo, SEQUEST algorithm) software. Validation of identified cross-linked peptides was by manual inspection of the MS/MS spectra, i.e. to verify the occurrence of b- and y-type fragment ions (67) that identify the peptide sequences.

### **DNA binding experiments**

SpyCas9:crRNA:tracrRNA complexes (containing wild-type SpyCas9 or PAM loop mutants PWN<sub>475-477</sub>→AAA, DWD<sub>1125-1127</sub>→AAA, and PWN<sub>475-477</sub>/DWD<sub>1125-1127</sub>→AAA/AAA) were reconstituted for 10 min at 37 °C in Reaction Buffer before being incubated with ~1 nM radiolabeled DNA target for 60 minutes at 37 °C. Reactions were resolved by 5% native PAGE and visualized by phosphorimaging (GE Healthcare).

### **AnaCas9 expression and purification**

Full-length *Actinomyces naeslundii* Cas9 (AnaCas9; residues 1-1101) was subcloned into a custom pET-based expression vector with an N-terminal His<sub>10</sub>-tag followed by Maltose-Binding Protein (MBP) and a TEV protease cleavage site. The protein was overexpressed in *Escherichia coli* strain Rosetta (DE3) and was purified to homogeneity by immobilized metal ion affinity chromatography and heparin affinity chromatography. An additional gel filtration chromatography step (HiLoad 16/60 Superdex200, GE Healthcare) was added to further purify AnaCas9 and remove trace nucleic acid contaminants prior to crystallization. Purified AnaCas9



protein in gel filtration buffer (50 mM HEPES 7.5, 300 mM KCl, 2 mM TCEP, 5% glycerol) was snap frozen in liquid nitrogen and stored at  $-80^{\circ}\text{C}$ . Selenomethionine-labeled AnaCas9 protein was expressed in Rosetta (DE3) cells grown in M9 minimal medium supplemented with  $50\text{ mg ml}^{-1}$  L-SeMet (Sigma) and specific amino acids to inhibit endogenous methionine synthesis. The SeMet-substituted protein was then purified using the same procedure as for the native AnaCas9 protein.

### **AnaCas9 crystallization and structure determination**

Crystals of native and SeMet-substituted AnaCas9 were grown by the hanging drop vapor diffusion method at  $20^{\circ}\text{C}$ . Aliquots ( $2.5\ \mu\text{l}$ ) of  $4.5\text{ mg ml}^{-1}$  native AnaCas9 protein in 50 mM HEPES 7.5, 300 mM KCl, 2mM TCEP, 5% glycerol were mixed with  $2.5\ \mu\text{l}$  of reservoir solution containing 10% (w/v) PEG 8000, 0.25 M calcium acetate, 50 mM magnesium acetate and 5 mM spermidine. Crystals appeared after 1–2 days, and they grew to a maximum size of  $0.15 \times 0.20 \times 0.35\text{ mm}$  over the course of 6 days. SeMet-substituted AnaCas9 crystals were grown and optimized under the same conditions. For cryogenic data collection, crystals were transferred into crystallization solutions containing 30% (v/v) glycerol as the cryoprotectant and then flash-cooled at 100 K. Native and SeMet single-wavelength anomalous diffraction (SAD) datasets were collected at beamline 8.3.1 of the Advanced Light Source, Lawrence Berkeley National Laboratory. Data from manganese-soaked AnaCas9 crystals were collected at the 8.2.2 beamline of the Advanced Light Source, Lawrence Berkeley National Laboratory. All diffraction data were integrated using Mosflm and scaled in SCALA (54, 55).

The AnaCas9 structure was solved using the single anomalous dispersion phasing method. Using SeMet data between 79.0 and  $3.2\ \text{\AA}$  resolution, both SHELXD/HKL2MAP (63) and HySS in Phenix (68) detected a total of 13 out of 18 possible selenium sites in the asymmetric unit. Initial phases were calculated using SOLVE followed by solvent flattening with RESOLVE to produce an electron-density map into which most of the protein residues could be unambiguously built (51). The initial model automatically generated from Phenix AutoBuild module was subjected to subsequent iterative rounds of manual building with COOT (52) and refinement against the  $2.2\ \text{\AA}$  native data in Refmac (56) and Phenix (53). The final model contains one zinc ion, two magnesium ions, AnaCas9 residues 8-49, 65-98, 134-170, and 225-1101, and has  $R_{\text{work}}$  and  $R_{\text{free}}$  values of 0.19 and 0.23, respectively. The N terminus (residues 1–

7), loop regions (residues 50-64), and a portion of the alpha-helical lobe (residues 99-133, 171-224) are completely disordered. Model validation showed 94% of the residues in the most favored and 5.8% in the allowed regions of the Ramachandran plot. The structure of Mn<sup>2+</sup>-bound AnaCas9 was obtained by molecular replacement using the program Phaser (69), which revealed two unambiguously refined Mn<sup>2+</sup> ions present in the RuvC active site. All statistics of the data processing and structure refinement of AnaCas9 are summarized in Table 2.

### **Complex reconstitution for negative-stain EM**

All samples for EM (10  $\mu$ l volumes) were prepared in Reaction Buffer at a final Cas9 concentration of 1  $\mu$ M. Cas9:RNA complexes contained 2  $\mu$ M crRNA:tracrRNA duplex and were incubated at 37 °C for 10 minutes before storing on ice until grid preparation. Cas9:RNA:DNA complexes were prepared by first generating Cas9:RNA as before and then adding the DNA duplex at 5  $\mu$ M (unlabeled) or 2  $\mu$ M (biotin labeled) and incubating an additional 10 minutes at 37 °C. When present, streptavidin (New England Biolabs) was added after formation of Cas9:RNA or Cas9:RNA:DNA complexes at a 2X unit excess over the biotinylated species, according to the manufacturer's unit definition (~65 ng/ $\mu$ L in the final reaction volume), followed by an additional 10 minute incubation at 37 °C before storing on ice. Catalytically inactive Cas9 (D10A/H840A) was used to generate the following samples: unlabeled Cas9:RNA:DNA, Cas9:RNA:DNA containing biotin modifications on one or both ends of the duplex, and Cas9:RNA:DNA containing an N-terminal MBP. Wild-type Cas9 was used to generate apo-Cas9 and all Cas9:RNA complexes.

### **Negative-stain electron microscopy**

We diluted Cas9 complexes for negative-stain EM to a concentration of ~25-60 nM in 20 mM Tris-HCl pH 7.5, 200 mM KCl, 1 mM DTT, and 5% glycerol immediately before applying the sample to glow-discharged 400 mesh continuous carbon grids. After adsorption for 1 min, we stained the samples consecutively with six droplets of 2% (w/v) uranyl acetate solution, gently blotted off the residual stain, and air-dried the sample in a fume hood. Data were acquired using a Tecnai F20 Twin transmission electron microscope operated at 120 keV at a nominal magnification of either 80,000X (1.45 Å at the specimen level) or 100,000X (1.08 Å at the

specimen level) using low-dose exposures ( $\sim 20 e^{-} \text{\AA}^{-2}$ ) with a randomly set defocus ranging from  $-0.5$  to  $-1.3 \mu\text{m}$ . A total of 300–400 images of each Cas9 sample were automatically recorded on a Gatan 4k x 4k CCD camera using the MSI-Raster application within the automated macromolecular microscopy software LEGINON (57).

### **Single-particle pre-processing**

All image pre-processing and two-dimensional classification was performed in Appion as described previously (44). The contrast transfer function (CTF) of each micrograph was estimated, and particles were selected concurrently with data collection using ACE2 (70) and a template-based particle picker (71), respectively. Micrograph phases were corrected using ACE2 (70), and the negatively-stained Cas9 particles were extracted using a  $288 \times 288$ -pixel box size. The particle stacks were binned by a factor of 2 for processing, and particles were normalized to remove pixels whose values were above or below  $4.5\text{-}\sigma$  of the mean pixel value using XMIPP (72).

### **Random conical tilt reconstruction**

Initial models for reconstructions of both apo-Cas9 and Cas9:RNA:DNA samples were determined using random conical tilt (RCT) methodology (34). Briefly, tilt-pairs of micrographs were recorded manually at  $0^\circ$  and  $55^\circ$ , and *ab initio* models were generated using the RCT module (73) in Appion (74). Particles were correlated between tilt-pairs using TiltPicker (75), binned by 2, and extracted from raw micrographs. Reference-free class averages were produced from untilted particle images by iterative 2D alignment and classification using MSA-MRA in IMAGIC (76). These class averages served as references for SPIDER (77) reference-based alignment and classification, and RCT volumes were calculated for each class average using back-projection in SPIDER based on these angles and shifts. The RCT model from the most representative class (largest number of particles) was low-pass filtered to  $60\text{-}\text{\AA}$  resolution and used to assign Euler angles to the entire data set of reference-free class averages. The resulting low-resolution model was again low-pass filtered to  $60\text{-}\text{\AA}$  resolution and used as the initial model for refinement of the three-dimensional structure by iterative projection matching using the

untilted particle images as previously described (78), with libraries from EMAN2 and SPARX software packages (58, 59).

### **Domain mapping and localization of RNA- and DNA-ends**

Particle stacks were binned by a factor of 2 and subjected to five rounds of iterative multivariate statistical analysis (MSA) and multi-reference alignment (MRA) using the IMAGIC (76) software package, to generate two-dimensional class averages of each complex. The resulting set of class averages for each species was normalized using ‘proc2d’ in EMAN (79). The EMAN classification program ‘classesbymra’ was used to match the labeled class average to the best-matching unlabeled class average based on cross-correlation coefficients. The difference maps were calculated by subtracting the unlabeled class average from the labeled class averages using ‘proc2d’ in EMAN. This same strategy was used to match the unlabeled class average to the best-matching reprojection of the corresponding structure. The Euler angles used for creating the reprojection were applied to the 3D electron density using ‘proc3d,’ and the surface representation visualized in Chimera (80) is shown along with its corresponding reprojection.

### **3D reconstruction and analysis**

Three-dimensional reconstructions were all performed using an iterative projection-matching refinement with libraries from the EMAN2 and SPARX software packages (58, 59). Refinement of the RCT starting models began using an angular increment of 25°, progressing down to 4° for all reconstructions. The resulting model was again low-pass filtered to 60-Å resolution and subjected to iterative projection-matching refinement to obtain the final structure. In an alternative approach for apo-Cas9 and Cas9:RNA:DNA, we used a low-pass filtered model of the other structure after initial refinement with untitled particles as an initial model for the above-mentioned projection matching refinement. This led to EM densities with similar structural features as the RCT models (Fig. S1H, S3I), and the structures converged to the final models presented in Fig. 1B,C. The resolution was estimated by splitting the particle stack into two equally sized data sets and calculating the Fourier shell correlation (FSC) between each of the back-projected volumes. The final reconstructions of Cas9, Cas9:RNA, and Cas9:RNA:DNA showed structural features to ~19-Å, ~21-Å, and ~19-Å resolution, respectively, based on the 0.5

Fourier shell correlation criterion. Reprojections of the final three-dimensional reconstruction showed excellent agreement with the reference-free class averages (Fig. S1G, S3H, S5D) and displayed a large distribution of Euler angles, despite some preferential orientations of the particles on the carbon film (Fig. S1E, S3F, S5E).

The final reconstruction was segmented using Segger (81) in Chimera (80) based on inspection of the similarities between lobes in the apo-Cas9 and Cas9:RNA:DNA reconstructions. A modeled A-form duplex was manually docked into the map with Chimera, using information from the labeling experiments and map segmentation, and by accommodating the substrate within the channel in the EM reconstruction. While the absolute handedness of our apo-Cas9 reconstruction could be confirmed using the X-ray crystal structure, the relative handedness of our Cas9:RNA:DNA reconstruction is uncertain. Free hand tests performed on this sample failed, likely due to the small and/or dynamic nature of the enzyme. The model we present (Fig. 1C) is based on the alpha-helical domain from the crystal structure having a more optimal CCC with the larger lobe of this reconstruction (0.83) than this lobe using the reconstruction of opposite handedness (0.74) (Fig. S4).

### **Enzymatic footprinting experiments**

DNA targets (55 bp) were prepared by 5'-radiolabeling either the target or displaced non-target strand and then hybridizing it to a 5X molar excess of unlabeled complementary strand. After incubating catalytically inactive (D10A/H840A) SpyCas9:crRNA:tracrRNA complexes (100 nM) with ~1 nM DNA substrate for 30 minutes at 37 °C in Reaction Buffer, 100 units of exonuclease III (NEB) or 1.2 µg nuclease P1 (Sigma) was added and reactions were incubated an additional 10 minutes at 37 °C before quenching with formamide gel loading buffer supplemented with 50 mM EDTA. Reaction products were resolved by 15% denaturing (7M urea) PAGE and visualized by phosphorimaging (GE Healthcare). Control reactions contained a non-targeting crRNA that is not complementary to the 55-bp DNA substrate. To define the sequence register of enzymatic reaction products, a DNA ladder was generated by 5'-radiolabeling the synthetic target or non-target strand without prior gel purification and compared to DNA cleavage products using active SpyCas9:RNA or FokI and BglII restriction enzymes (NEB). Note that we observed SpyCas9:RNA cleaving the non-target strand between nucleotides 4 and 5 from the PAM end, in contrast to the cleavage site observed previously (8).

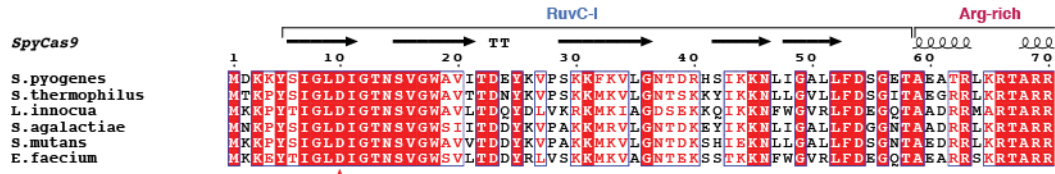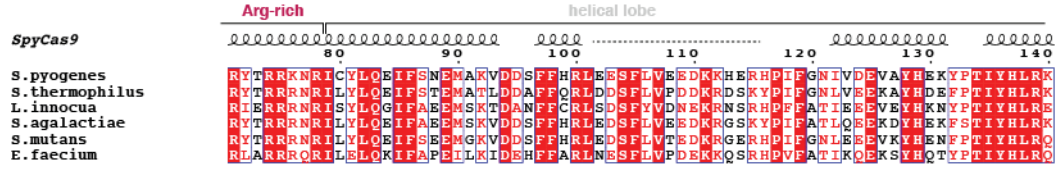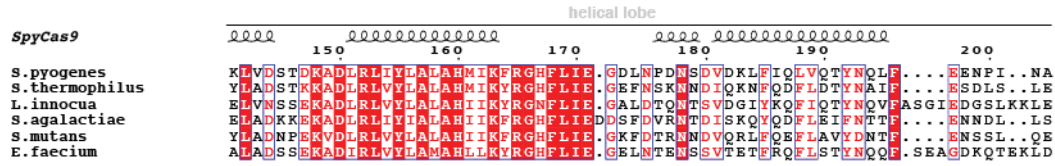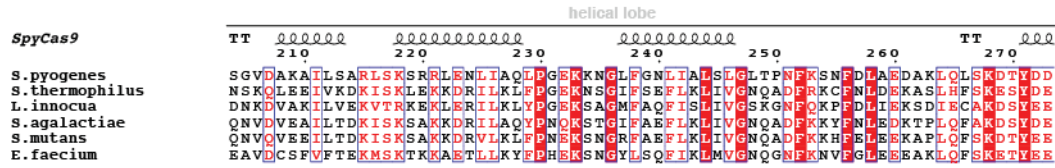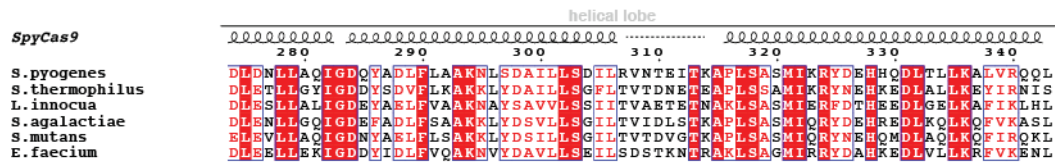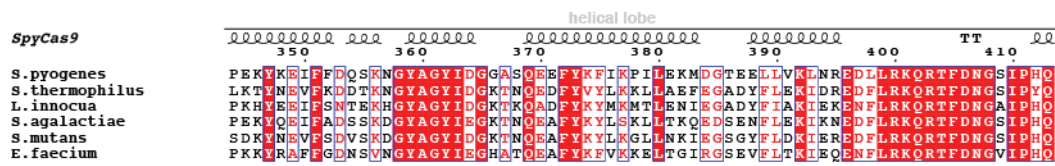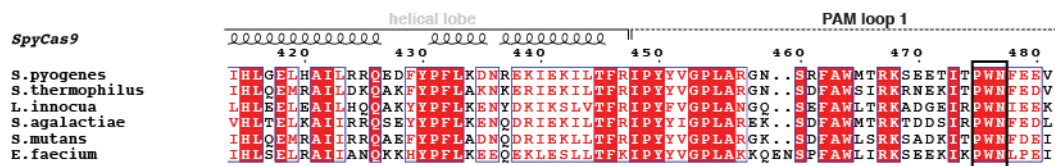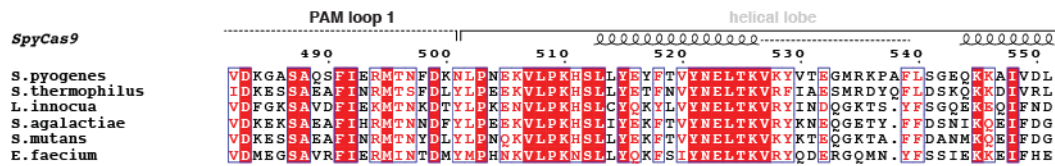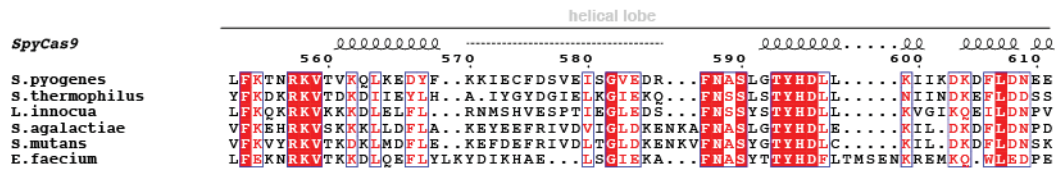

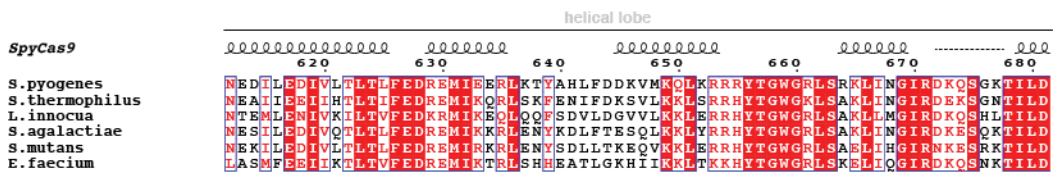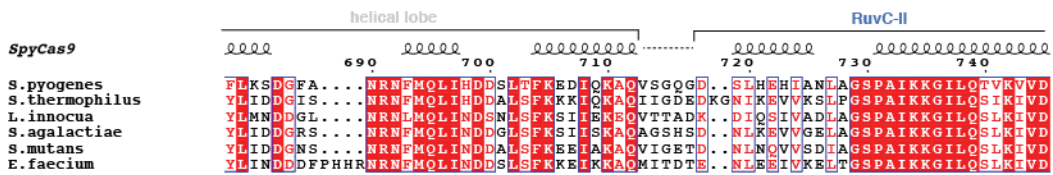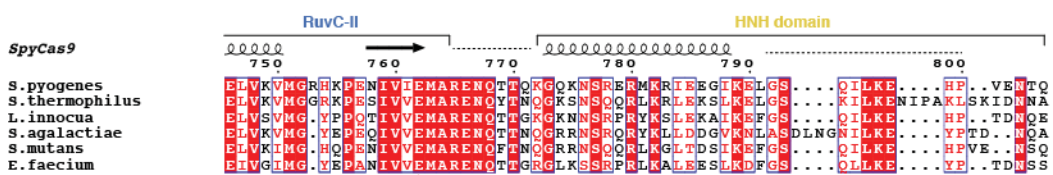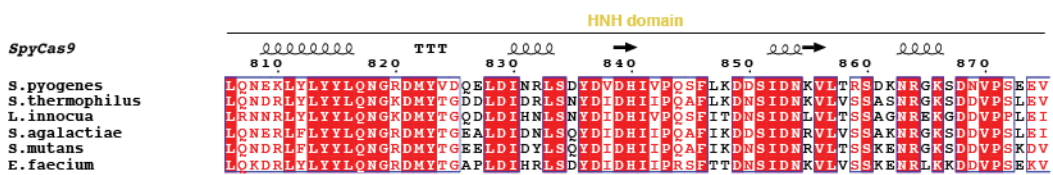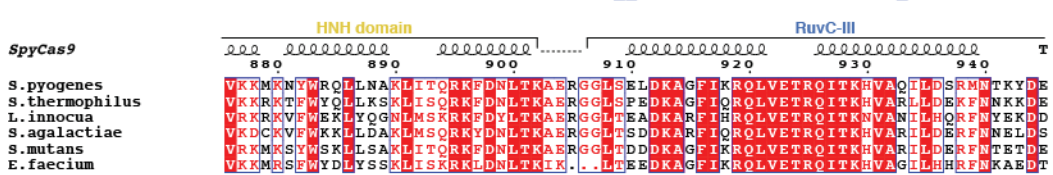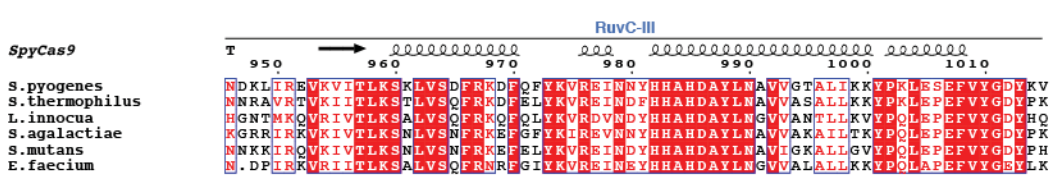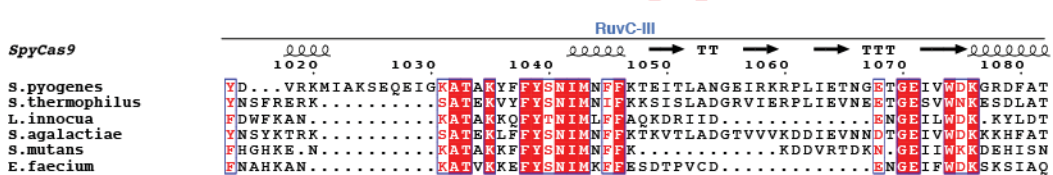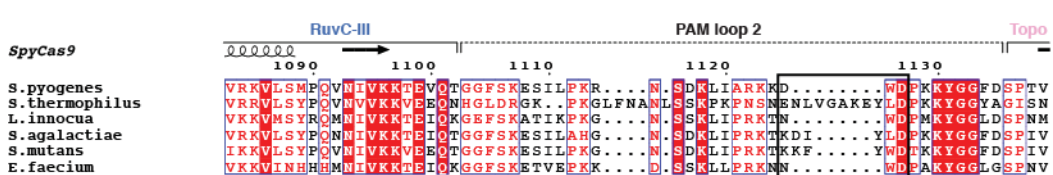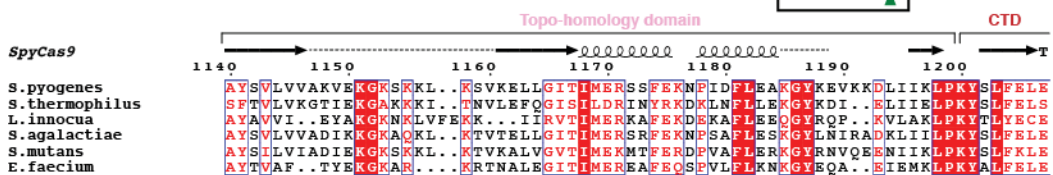

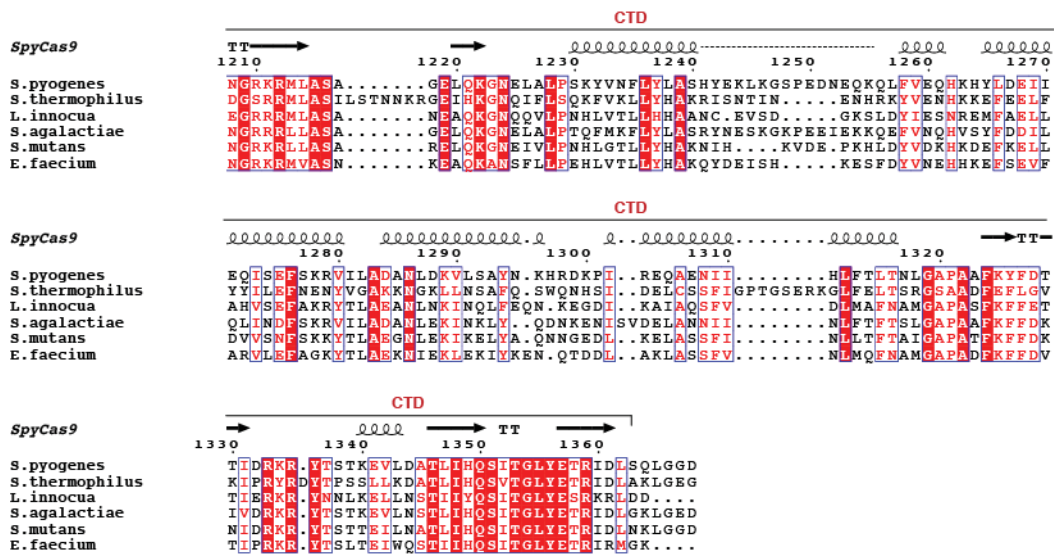

**Figure S1. Multiple sequence alignment of Cas9 proteins associated with Type II-A CRISPR loci.** Primary sequences of Cas9 proteins from *Streptococcus pyogenes* (GI 15675041), *Streptococcus thermophilus* LMD-9 (GI 11662823), *Listeria innocua* Clip 11262 (GI 16801805), *Streptococcus agalactiae* A909 (GI 76788458), *Streptococcus mutans* UA159 (GI 24379809), and *Enterococcus faecium* 1,231,408 (GI 257893735) were aligned using MAFFT (82). The alignment was generated in ESPript (83) using default settings. Strictly conserved residues are shown with white letters on red background. Residues with >70% similarity are shown in red and boxed in blue. The domain organization of *SpyCas9* (as in Fig. 1A) and secondary structure are shown above the sequences. Disordered segments of the polypeptide chain are indicated with dashed lines. RuvC domain catalytic residues are denoted with red arrowheads. HNH domain active site residues are denoted with blue arrowheads. Tryptophan residues that crosslinked to nucleotides flanking the PAM are denoted with green arrowheads, and tryptophan-containing motifs mutated in Fig. 3D are boxed in black.



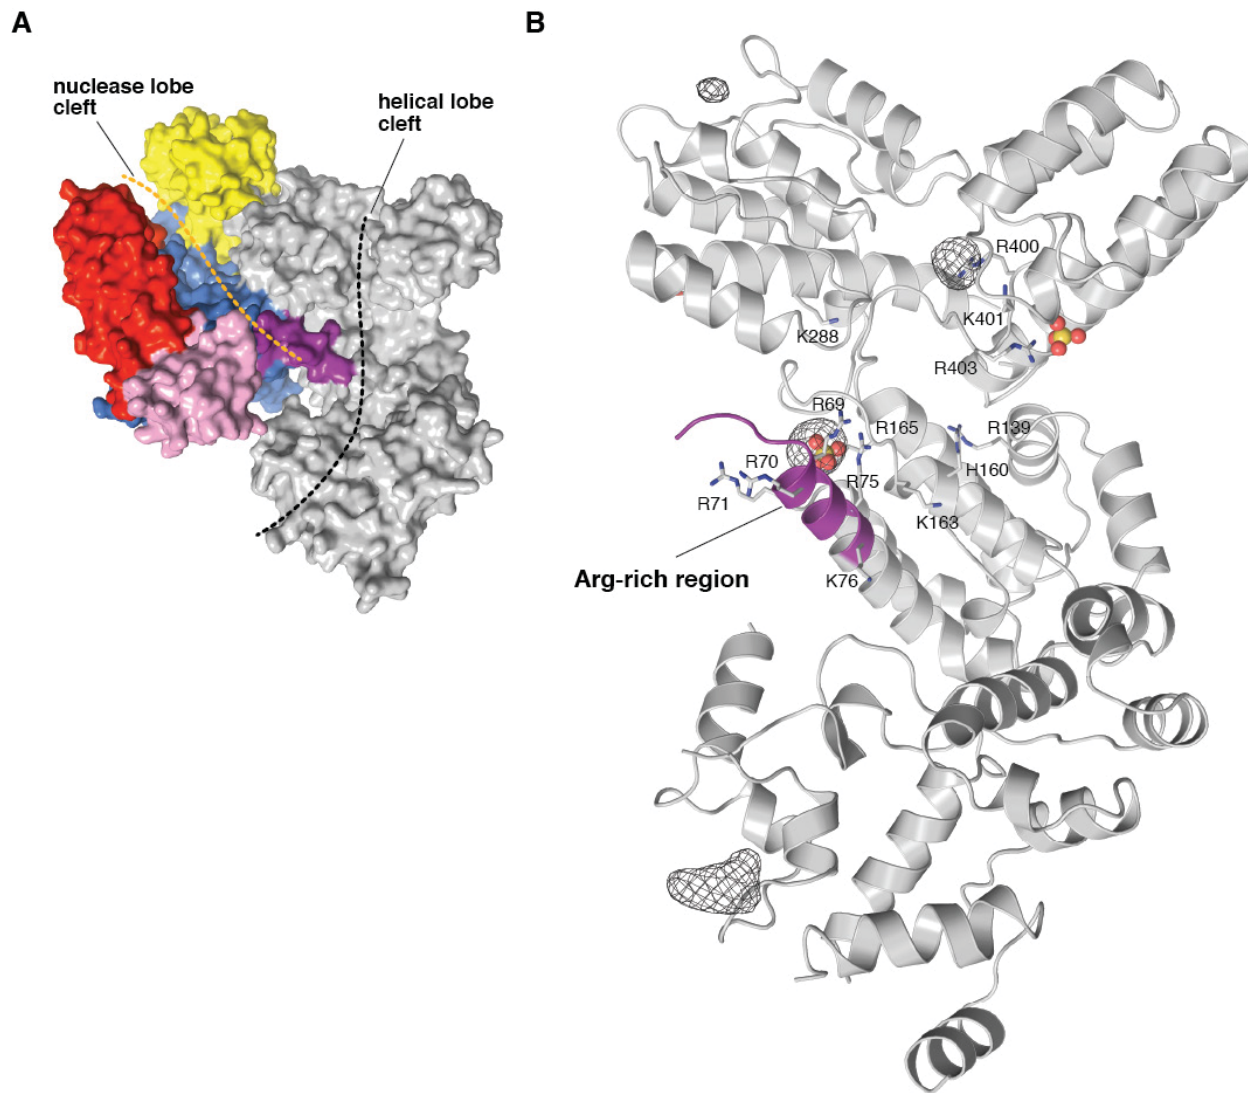

**Figure S2. The helical lobe of SpyCas9 features a putative nucleic acid binding cleft.** (A) Surface representation of SpyCas9, colored according to the scheme in Fig. 1A. The surface clefts located on the nuclease and alpha-helical lobes of the protein are indicated with orange and black dashed lines, respectively. (B) Close-up view of the helical lobe of SpyCas9. Arg-rich region is depicted in purple. Conserved basic (Arg, Lys) residues lining the cleft are shown in stick format. Sulfate ions bound to the cleft are shown in ball-and-stick format. Anomalous difference electron density map (black mesh, contoured at 5.0  $\sigma$ ) indicates positions of tungstate ions bound to SpyCas9 in crystals soaked with 10 mM  $\text{Na}_2\text{WO}_4$ .

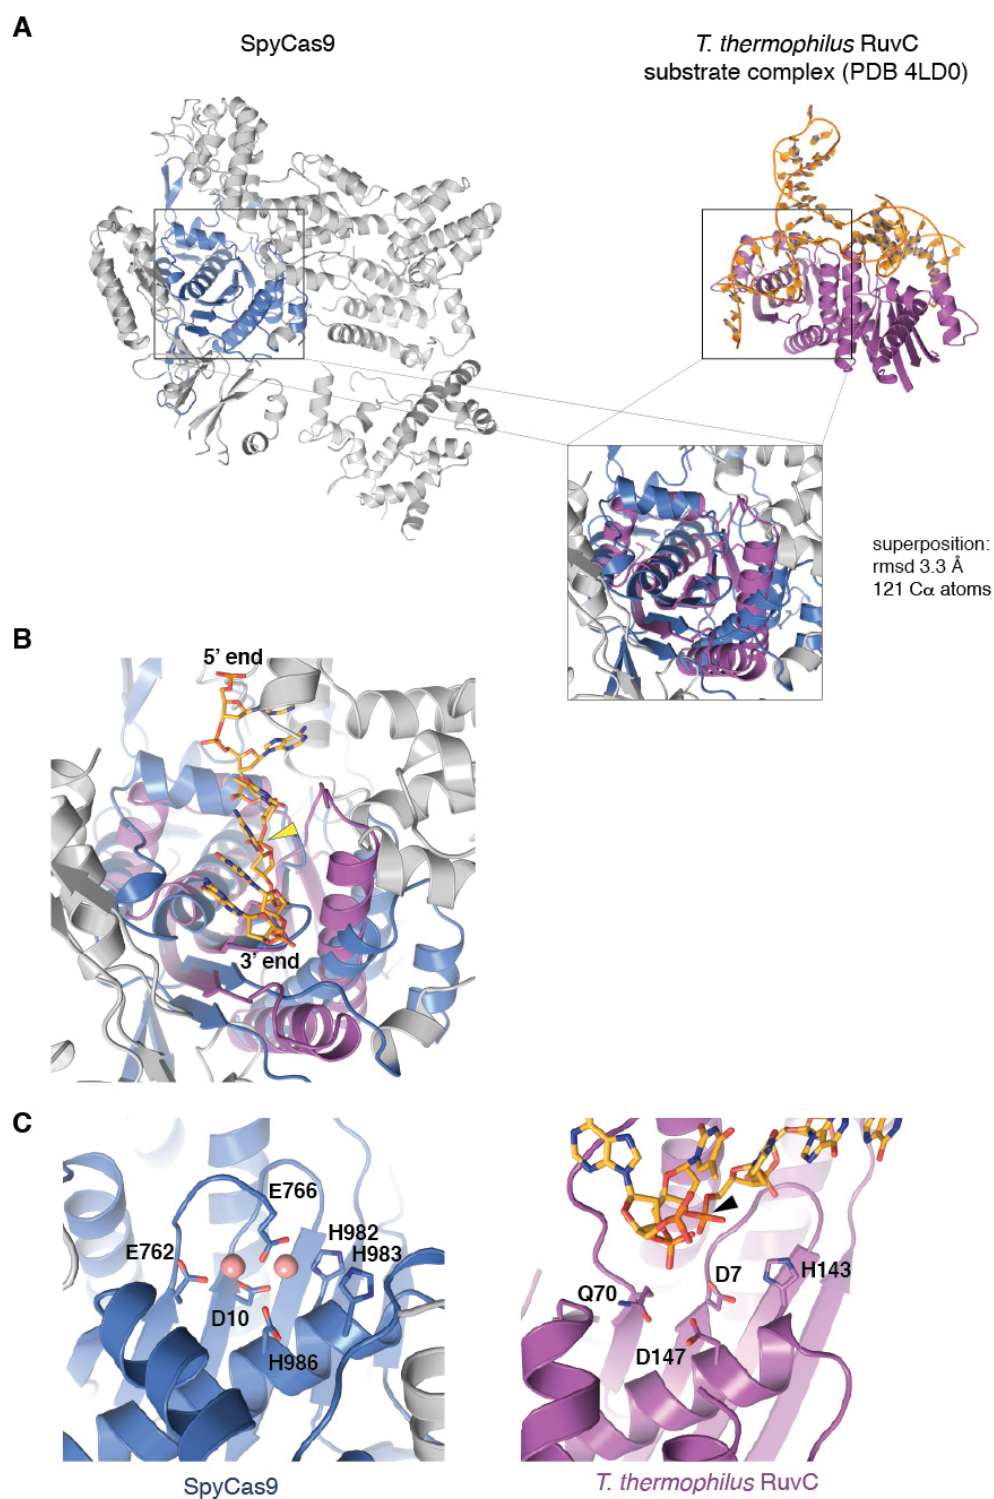

**Figure S3. Structural superposition of SpyCas9 with RuvC resolvase defines the directionality of non-target DNA strand in DNA-bound SpyCas9 holoenzyme.** (A) Structural superposition of SpyCas9 with *Thermus thermophilus* RuvC resolvase bound to a Holliday junction substrate (PDB entry 4LD0) (28). The structures were superimposed using DALI (84) and are shown in the same orientation. The SpyCas9 RuvC domain is depicted in blue, and the RuvC resolvase is colored purple. Inset shows the superposition of the two structures. The proteins superimpose with an rmsd of 3.3 Å over 121 C $\alpha$  atoms. (B) Close-up view of the SpyCas9 nuclease lobe cleft harbouring the RuvC active site. Six nucleotides of single stranded DNA are modeled in the cleft (stick format, colored orange) based on the superposition in (A). The position of the scissile phosphate is indicated with a yellow

arrowhead. (C) Close-up views of the catalytic sites in SpyCas9 (left) and *T. thermophilus* RuvC (right). Active site residues are shown in stick format. Pink spheres represent two  $\text{Mn}^{2+}$  ions bound to the SpyCas9 RuvC domain in crystals soaked with 20 mM  $\text{MnCl}_2$ . The DNA substrate is shown in stick format, and the position of the scissile phosphate is indicated with a black arrowhead.

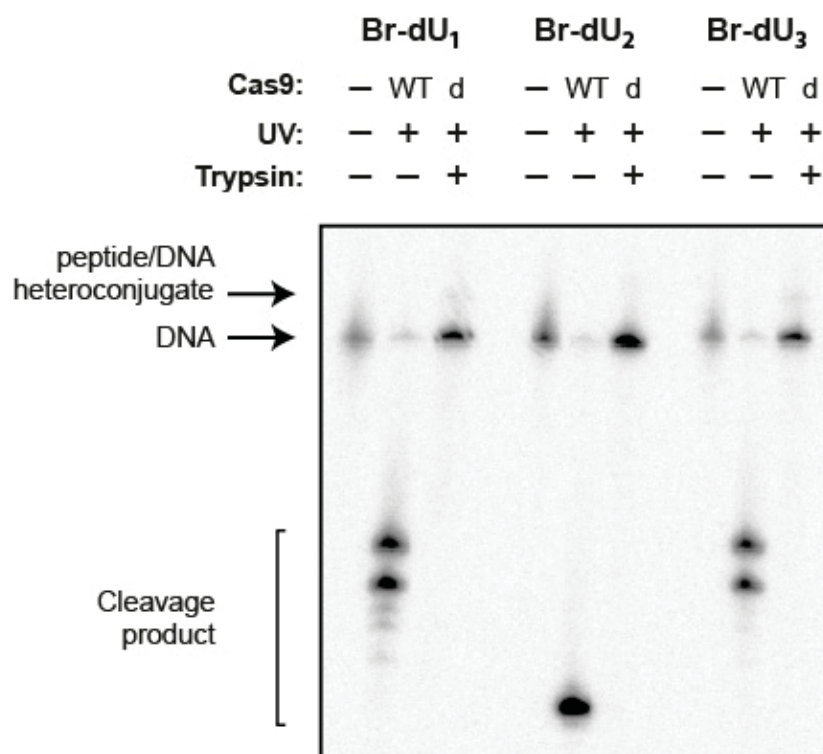

**Figure S4. Br-dU containing dsDNA substrates are cleaved by WT SpyCas9 and crosslink to catalytically inactive dCas9.** DNA cleavage assays were performed and analysed by denaturing PAGE to verify that modified dsDNA substrates do not impair cleavage by WT SpyCas9. Sequences for each substrate (Br-dU<sub>1</sub>, Br-dU<sub>2</sub>, and Br-dU<sub>3</sub>) can be found in Supplementary Table S2. Reactions with catalytically inactive (D10A/H840A) dCas9 that can bind but not cleave DNA showed an additional band of higher molecular weight following UV irradiation and trypsin digestion, providing evidence for the generation of a peptide-DNA heteroconjugate. Crosslinking reactions with Br-dU<sub>1</sub>, Br-dU<sub>2</sub>, and Br-dU<sub>3</sub> were analyzed by LC-MS/MS, but only reactions with Br-dU<sub>1</sub> and Br-dU<sub>3</sub> dsDNA substrates resulted in the identification of crosslinked peptides.

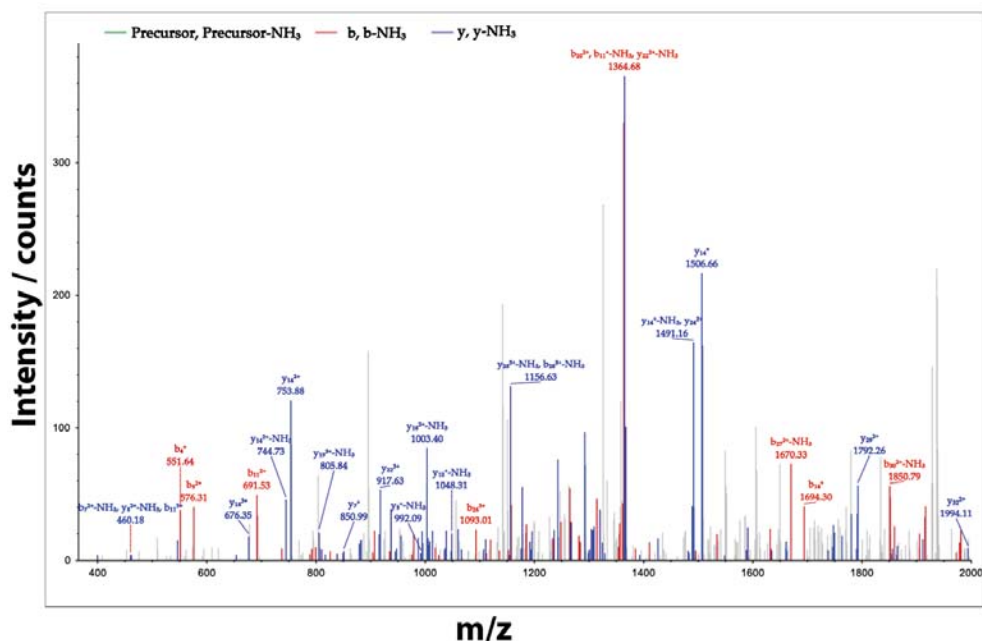

| #1 | b <sup>+1</sup> | b <sup>+2</sup> | b <sup>+3</sup> | Seq.        | y <sup>+1</sup> | y <sup>+2</sup> | y <sup>+3</sup> | #2 |
|----|-----------------|-----------------|-----------------|-------------|-----------------|-----------------|-----------------|----|
| 1  | 148.07570       | 74.54149        | 50.03008        | F           |                 |                 |                 | 33 |
| 2  | 219.11282       | 110.06005       | 73.70912        | A           | 3984.87105      | 1992.93916      | 1328.96187      | 32 |
| 3  | 405.19214       | 203.09971       | 135.73556       | W           | 3913.83393      | 1957.42060      | 1305.28283      | 31 |
| 4  | 552.22755       | 276.61741       | 184.74737       | M-Oxidation | 3727.75461      | 1864.38094      | 1243.25639      | 30 |
| 5  | 653.27523       | 327.14125       | 218.42993       | T           | 3580.71919      | 1790.86323      | 1194.24458      | 29 |
| 6  | 809.37635       | 405.19181       | 270.46363       | R           | 3479.67151      | 1740.33939      | 1160.56202      | 28 |
| 7  | 937.47132       | 469.23930       | 313.16196       | K           | 3323.57039      | 1662.28883      | 1108.52831      | 27 |
| 8  | 1024.50335      | 512.75531       | 342.17263       | S           | 3195.47542      | 1598.24135      | 1065.82999      | 26 |
| 9  | 1153.54595      | 577.27661       | 385.18683       | E           | 3108.44339      | 1554.72533      | 1036.81931      | 25 |
| 10 | 1282.58855      | 641.79791       | 428.20103       | E           | 2979.40079      | 1490.20403      | 993.80511       | 24 |
| 11 | 1383.63623      | 692.32175       | 461.88359       | T           | 2850.35819      | 1425.68273      | 950.79091       | 23 |
| 12 | 1496.72030      | 748.86379       | 499.57828       | I           | 2749.31051      | 1375.15889      | 917.10835       | 22 |
| 13 | 1597.76798      | 799.38763       | 533.26084       | T           | 2636.22644      | 1318.61686      | 879.41366       | 21 |
| 14 | 1694.82075      | 847.91401       | 565.61177       | P           | 2535.17876      | 1268.09302      | 845.73110       | 20 |
| 15 | 2106.95903      | 1053.98315      | 702.99119       | W-dU        | 2438.12599      | 1219.56663      | 813.38018       | 19 |
| 16 | 2221.00196      | 1111.00642      | 741.00550       | N           | 2025.98771      | 1013.49749      | 676.00075       | 18 |
| 17 | 2368.07038      | 1184.53883      | 790.02831       | F           | 1911.94478      | 956.47603       | 637.98644       | 17 |
| 18 | 2497.11298      | 1249.06013      | 833.04251       | E           | 1764.87636      | 882.94182       | 588.96364       | 16 |
| 19 | 2626.15558      | 1313.58143      | 876.05671       | E           | 1635.83376      | 818.42052       | 545.94944       | 15 |
| 20 | 2725.22400      | 1363.11564      | 909.07952       | V           | 1506.79116      | 753.89922       | 502.93524       | 14 |
| 21 | 2824.29242      | 1412.64985      | 942.10232       | V           | 1407.72274      | 704.36501       | 469.91243       | 13 |
| 22 | 2939.31937      | 1470.16332      | 980.44464       | D           | 1308.65432      | 654.83080       | 436.88962       | 12 |
| 23 | 3067.41434      | 1534.21081      | 1023.14296      | K           | 1193.62737      | 597.31732       | 398.54731       | 11 |
| 24 | 3124.43681      | 1562.72154      | 1042.15012      | G           | 1065.53240      | 533.26984       | 355.84898       | 10 |
| 25 | 3195.47293      | 1598.24010      | 1065.82916      | A           | 1008.51093      | 504.75910       | 336.84183       | 9  |
| 26 | 3282.50496      | 1641.75612      | 1094.83984      | S           | 937.47381       | 469.24054       | 313.16279       | 8  |
| 27 | 3353.54208      | 1677.27468      | 1118.51888      | A           | 850.44178       | 425.72453       | 284.15211       | 7  |
| 28 | 3481.60066      | 1741.30397      | 1161.20507      | Q           | 779.40466       | 390.20597       | 260.47307       | 6  |
| 29 | 3568.63269      | 1784.81998      | 1190.21575      | S           | 651.34608       | 326.17668       | 217.78688       | 5  |
| 30 | 3715.70111      | 1858.35419      | 1239.23855      | F           | 564.31405       | 282.66066       | 188.77620       | 4  |
| 31 | 3828.78518      | 1914.89623      | 1276.93324      | I           | 417.24563       | 209.12645       | 139.75339       | 3  |
| 32 | 3957.82778      | 1979.41753      | 1319.94744      | E           | 304.16156       | 152.58442       | 102.05870       | 2  |
| 33 |                 |                 |                 | R           | 175.11896       | 88.06312        | 59.04450        | 1  |

**Figure S5. Trp476<sup>Spy</sup> crosslinks to Br-dU<sub>1</sub> dsDNA target.** Tandem mass spectrum (MS/MS) and fragment ion list resulting from collision-induced dissociation (CID) of the 3+ ion occurring at mass-to-charge ratio  $m/z = 1377.9835$ . This corresponds to the  $[M + 3H]^{3+}$  ion of the peptide, FAWMTRKSEETITP(W-dU)NFEEVVDKGASQSFIER, which corresponds to residues 462-494 of SpyCas9, in which Trp476<sup>Spy</sup> is crosslinked to deoxyuridine (dU) and Met468<sup>Spy</sup> is oxidized (i.e. methionine sulfoxide). (Crosslinking to deoxyuridine and oxidation result in exact, monoisotopic mass additions of 226.05896 Da and 15.994915 Da, respectively.) Fragment ions b15 through b32 and y19 through y32 exhibit the deoxyuridine mass addition. Detected b-ions are shown in red and y-ions are shown in blue.

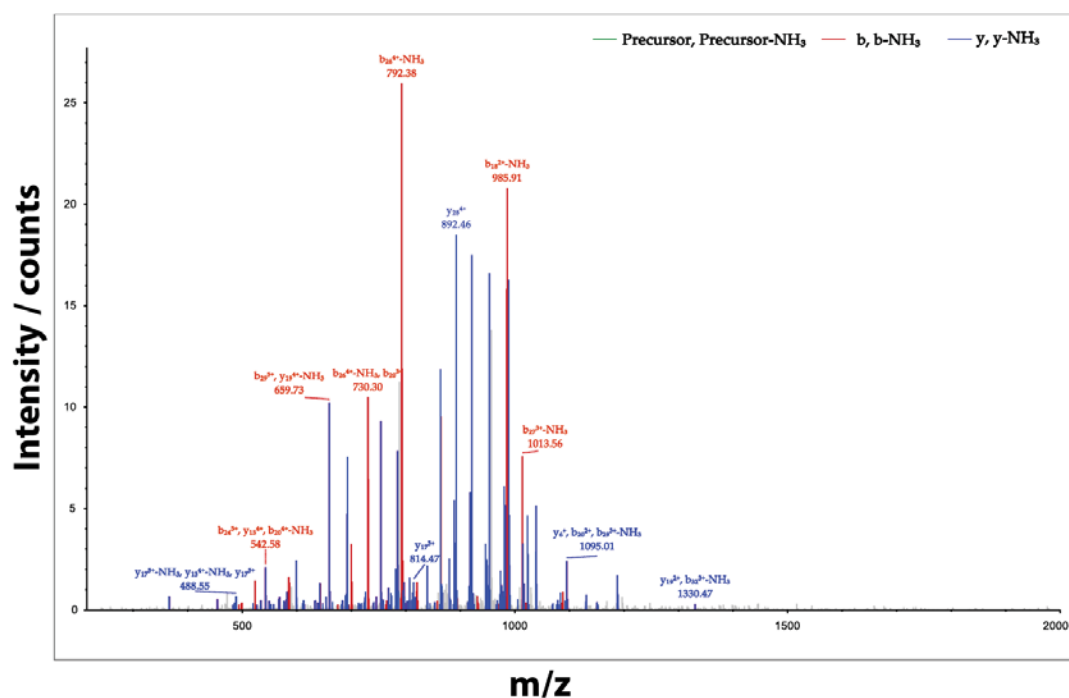

| #1 | b <sup>-1</sup> | b <sup>-2</sup> | b <sup>-3</sup> | b <sup>-4</sup> | b <sup>-5</sup> | Seq.       | y <sup>-1</sup> | y <sup>-2</sup> | y <sup>-3</sup> | y <sup>-4</sup> | y <sup>-5</sup> | #2 |
|----|-----------------|-----------------|-----------------|-----------------|-----------------|------------|-----------------|-----------------|-----------------|-----------------|-----------------|----|
| 1  | 129.10225       | 85.05476        | 43.70560        | 33.03102        | 26.62627        | K          | 4021.01806      | 2011.01267      | 1341.01007      | 1006.00997      | 805.00943       | 33 |
| 2  | 230.14993       | 115.57860       | 77.38816        | 58.29294        | 46.83581        | T          | 3919.97038      | 1960.48883      | 1307.32831      | 980.74905       | 784.79990       | 31 |
| 3  | 359.19253       | 180.09990       | 120.40236       | 90.55359        | 72.64433        | E          | 3790.92778      | 1895.96753      | 1264.31411      | 948.48740       | 758.99138       | 30 |
| 4  | 458.26095       | 229.63411       | 153.42517       | 115.32609       | 92.45801        | V          | 3691.85936      | 1846.43332      | 1231.29130      | 923.72030       | 739.17769       | 29 |
| 5  | 586.31953       | 293.66340       | 196.11136       | 147.33534       | 118.06973       | Q          | 3563.80078      | 1782.40403      | 1188.60511      | 891.70655       | 713.56598       | 28 |
| 6  | 687.36721       | 344.18724       | 229.79392       | 172.59726       | 138.27926       | T          | 3462.75310      | 1731.88019      | 1154.92255      | 866.44373       | 693.35644       | 27 |
| 7  | 744.38988       | 372.69798       | 248.80108       | 186.85263       | 149.68356       | G          | 3405.73163      | 1703.36945      | 1135.91539      | 852.18336       | 681.95215       | 26 |
| 8  | 801.41015       | 401.20871       | 267.80823       | 201.10799       | 161.08785       | G          | 3348.71016      | 1674.85872      | 1116.90824      | 837.93300       | 670.54785       | 25 |
| 9  | 948.47857       | 474.74292       | 316.83104       | 237.87510       | 190.50153       | F          | 3201.64174      | 1601.32451      | 1067.88543      | 801.16589       | 641.13417       | 24 |
| 10 | 1035.51060      | 518.25894       | 345.84172       | 259.63311       | 207.90794       | S          | 3114.60971      | 1557.80849      | 1038.87475      | 779.40788       | 623.72776       | 23 |
| 11 | 1183.60557      | 582.30642       | 388.54004       | 291.65685       | 233.52693       | K          | 2986.51474      | 1493.76101      | 996.17643       | 747.38414       | 586.10877       | 22 |
| 12 | 1292.64817      | 646.82772       | 431.55424       | 323.91750       | 259.33545       | E          | 2857.47214      | 1429.23971      | 953.16223       | 715.12349       | 572.30025       | 21 |
| 13 | 1379.68020      | 690.34374       | 460.56492       | 345.67551       | 276.74186       | S          | 2770.44011      | 1385.72369      | 924.15155       | 693.36548       | 554.89384       | 20 |
| 14 | 1492.76427      | 746.88577       | 498.25961       | 373.94652       | 299.35867       | I          | 2657.35604      | 1329.18166      | 886.45686       | 665.09447       | 532.27703       | 19 |
| 15 | 1605.84834      | 803.42781       | 535.95430       | 402.21754       | 321.97549       | L          | 2544.27197      | 1272.63962      | 848.76217       | 636.82345       | 509.66021       | 18 |
| 16 | 1702.90111      | 851.95419       | 568.30522       | 426.48073       | 341.38604       | P          | 2447.21920      | 1224.11324      | 816.41125       | 612.56026       | 490.24966       | 17 |
| 17 | 1830.99608      | 916.00168       | 611.00354       | 458.50448       | 367.00504       | K          | 2319.12423      | 1180.06575      | 773.71293       | 580.53651       | 464.63067       | 16 |
| 18 | 1987.09720      | 994.05224       | 663.03725       | 497.52976       | 398.22526       | R          | 2163.02311      | 1082.01519      | 721.67922       | 541.51123       | 433.41044       | 15 |
| 19 | 2101.14013      | 1051.07370      | 701.05156       | 526.04049       | 421.03385       | N          | 2048.98018      | 1024.99373      | 683.69491       | 513.00050       | 410.60186       | 14 |
| 20 | 2188.17216      | 1094.58972      | 730.06224       | 547.79650       | 438.44025       | S          | 1961.94015      | 981.47771       | 654.65423       | 491.24249       | 393.19545       | 13 |
| 21 | 2303.19911      | 1152.10319      | 768.40455       | 576.55523       | 461.44564       | D          | 1846.92120      | 923.96424       | 616.31192       | 462.48576       | 370.19006       | 12 |
| 22 | 2474.29899      | 1237.65358      | 825.43815       | 619.33043       | 495.66580       | K-Carbamyl | 1675.82041      | 838.41384       | 559.27832       | 419.71056       | 335.96990       | 11 |
| 23 | 2587.38396      | 1294.19562      | 863.13284       | 647.60145       | 518.28261       | L          | 1562.73634      | 781.87181       | 521.58363       | 391.43954       | 313.35309       | 10 |
| 24 | 2700.46803      | 1350.73765      | 900.82753       | 675.87247       | 540.89943       | I          | 1448.65227      | 725.32977       | 483.88994       | 363.16853       | 290.73828       | 9  |
| 25 | 2771.50515      | 1386.25621      | 924.50657       | 693.63175       | 555.10685       | A          | 1378.61515      | 689.81121       | 460.20990       | 345.40925       | 276.52895       | 8  |
| 26 | 2927.60627      | 1464.30677      | 976.54027       | 732.65703       | 586.32708       | R          | 1222.51403      | 611.76065       | 408.17619       | 306.38397       | 245.30963       | 7  |
| 27 | 3055.70124      | 1528.35426      | 1019.23860      | 764.68077       | 611.94607       | K          | 1094.41906      | 547.71317       | 385.47877       | 274.36022       | 219.68963       | 6  |
| 28 | 3183.79621      | 1592.40174      | 1061.93692      | 796.70451       | 637.56506       | K          | 968.32409       | 483.66568       | 322.77955       | 242.33648       | 194.07064       | 5  |
| 29 | 3298.82316      | 1649.91522      | 1100.27924      | 825.46125       | 660.57045       | D          | 851.29714       | 426.15221       | 294.43723       | 213.57974       | 171.06525       | 4  |
| 30 | 3790.92777      | 1895.96752      | 1284.31411      | 948.48740       | 758.99138       | W-pU       | 358.19253       | 180.09990       | 120.40236       | 90.55359        | 72.84433        | 3  |
| 31 | 3805.95472      | 1953.48100      | 1302.65642      | 977.24414       | 781.99877       | D          | 244.16558       | 122.58643       | 82.06004        | 61.79685        | 49.63094        | 2  |
| 32 | 4003.00749      | 2002.00738      | 1335.00735      | 1001.50733      | 801.40732       | P          | 147.11281       | 74.06004        | 49.70912        | 37.53366        | 30.22838        | 1  |
| 33 |                 |                 |                 |                 |                 | K          |                 |                 |                 |                 |                 |    |

**Figure S6. Trp1126<sup>Spy</sup> crosslinks to Br-dU<sub>3</sub> dsDNA target.** MS/MS spectrum and fragment ion list resulting from CID of the 5<sup>+</sup> ion occurring at  $m/z = 830.6273$ . This corresponds to the  $[M + 5H]^{5+}$  ion of the peptide, KTEVQTGGFSKESILPKRNSDKLIARKKD(W-pdU)DPK, which corresponds to residues 1097-1129 of SpyCas9, in which Trp1126<sup>Spy</sup> is crosslinked to deoxyuridine monophosphate (pdU) and Lys1121<sup>Spy</sup> is carbamylated. (Cross-linking to deoxyuridine monophosphate and carbamylation result in exact, monoisotopic mass additions of 306.02529 Da and 43.005814 Da, respectively.) Fragment ions b<sub>30</sub> through b<sub>32</sub> and y<sub>4</sub> through y<sub>32</sub> exhibit the deoxyuridine monophosphate mass addition. Detected b-ions are shown in red and y-ions are shown in blue.

RuvC-I

```

Ana 1 MWYASLMSAHHLRVGIDVGTTHSVGLATLRVD DHGTP..... IELLSALSHIHDSG.VGKEGK
Nme 1 .MAAFKPFPIN YILGLDITIGASVGLWAVETID EDENP..... ICLIDLGVRVFERAENPFTG.
cje 1 .....MARILAFDITIGSSIGWAFSENDE..... LKDCGVRIFTKAENPFTG.
rde 1 .....MKKEIKDYFLGLDVTGGSVGLWAVTTD YKLLKA..... NRKDLWGMRCFETA...
sth 1 .....MTKPYSIGLDITIGTNSVGLWAVTDD YKVPSSKMKVLSGNTSKKYYIKNLLGVLLFDSGI...
smu 1 .....MKKPYSIGLDITIGTNSVGLWAVTTD YKVPAAKMKVLSGNTDKSHIEKNLLGALFDSGN...
sag 1 .....MNKPYSIGLDITIGTNSVGSIIITDE YKVPAAKMRVLSGNTDKKEYIKNLLIGALFDSGN...
spy 1 .....MDKKYSIGLDITIGTNSVGLWAVITDE YKVPSSKFKVLSGNTDRHSIKNLLIGALFDSGE...

```

Arg-rich      alpha-helical lobe

```

Ana 57 KDHDTRFKKLSGIANRARRLLHRRRTQIQQLDEVLRDLGFIP.....TPG.....
Nme 56 ..DSLAMARRLARSVRRLLTRRRRAHRLLRACRLKKREGLVQAADF.DE.....
cje 42 ..ESLALPRLRLASARKRLARRKARLNLHLKHLIANEFKNYEDY.QSFD.....
rde 49 .....TAEVRRLLHRGARRRIRRRKKRIKLQELFSQEIATDEGFFQRMKESPFAEDKTILQENTLFDND
sth 58 .....TAEGRRLLKRTARRRYTRRRNRILYLOEIFSTEMATLDDAFFQRLLDSSFLVPDDKRSKY.PIF.G
smu 58 .....TAEDRRLLKRTARRRYTRRRNRILYLOEIFSEEMKGVDDSPFHRLEDSFLVTEDKRGERH.PIF.G
sag 58 .....TAAARRLLKRTARRRYTRRRNRILYLOEIFAEEMKGVDDSPFHRLEDSFLVEEDKRGSKY.PIF.A
spy 58 .....TAEATRLKRTARRRYTRRKNRILCYLQEIFSNEMAKVVDDSPFHRLEESFLVEEDKHERH.PIF.G

```

```

Ana 102 .EFLDLNEQTDPIRVWRVRARLVEEKLP EELRGP AISMARHIAHRRGWRNPY SK.....V.....
Nme 100 ....NGLIKSLPNTFWQLRAAADLRKLT....PL EWSAVILLHLIKHREGYLSQRKN.....E.....
cje 88 .ESLAKAYKGSLSIPYELRRFRALNELLS....KQ DPARVILHIAKRGSYDDIKNN.....G.....
rde 114 KDFADKTYHKAQPTINHLKAWIENKVKPDPDR.... LLYLACHNIIKRRGHFLFEGD.PSENQF.DTSIQ
sth 121 NLVEEKAYHDEFPTIYHRLQYLADNPEKVDLR....LVYLALAHMIKRGHFLEGE.FNSKNNDIQKRFQ
smu 121 NLEEVEKYHENFPTIYHLRQYLADNPEKVDLR....LVYLALAHMIKRGHFLEGE.KFDRNNDVQRLFQE
sag 121 TLQEKDYHEKFPSTIYHLRKLADKKEKADLR....LIYIALAHMIKRGHFLEDDSFVDRNTDISKQYQD
spy 121 NIVDEVAYHEKYPSTIYHLRKKLVDS TDKADLR....LIYIALAHMIKRGHFLEGE.LNPDNSDVQKLFIQ

```

deletions in the alpha-helical lobe of AnaCas9

```

Ana 157 .....ESLSP.....A ESEPFMKALRERITL...
Nme 148 .....GETAD.....KELGALLKGVADNAHAL.
cje 139 .....DEKS.....EI.....LKAIKQNEKLV
rde 180 LFEYLRREDMEVDIDADSQKVKEILKDSSSLKNSKQSRNLKILGLKPSDKQKKA....TNLISGNKINFA
sth 188 FLDTYNAlFESDLSENKQLEEVVKDKISK....LEKDRILKFPPEKNSGIFSEPLKLLIVGNQADFR
smu 188 FLAVYDNTFENSLLQEQNVQVEEILTQKISK....SAKKDRVLKFPPEKNSNGRFAEPLKLLIVGNQADFK
sag 189 FLEIPIFNTTFENNLLSQNVQVDEAILTDKISK....SAKKDRILAQYPNQKSTGIFAEPKLLIVGNQADFK
spy 188 LVQTYNQLFEEFNINASGVDAKAILSARLSK....SRRLENLIAQLPGEKKNGLFGNLIALSLGLT PNFK

```

deletions in the alpha-helical lobe of AnaCas9

```

Ana 178 .....TTGEVLDLDDG.....ITPG...
Nme 170 .....QTGDFR.....TPA...
cje 158 .....YSVGEYL.....YKE...
rde 246 DLYDNPDLDKAEKNISISFSKDDFDALSDDLALILGDSF.ELLLKAKAVYNCVSLSKVI....GDEQYLS
sth 254 KCFN....LEDEKASLHFSKESYDEDELETLG YIGDDYSDFVFLKAKKLYDAILLSGILTVTDNEEAPLS
smu 244 KHFE....LEEKAPLQFSKDYTEELELVLLG IGDNNYAEFLSAAKKLYDSILLSGILTVTDVGVKAPLS
sag 255 KYFN....LEDKTPLQFAKDSYDEDELENLLG YIGDFADLFSAAKLYDSVLLSGILTVIDLSKAPLS
spy 254 SNFD....LAEDAKLQLSKDYDDLDNLLA QIGDQYADLFLAANKLSDAILLSDIILRVNTEIKAPLS

```

deletions in the alpha-helical lobe of AnaCas9

```

Ana 192 QAMAQVA.....LTHNIS.....MR..GFEGL..GK.....
Nme 179 ELALNKF.....EKESHG.....IR..NQRGDYSHT.....
cje 170 ..YFQFKKEN.....SKEFIN.....VR..NKKESYERC.....
rde 310 FAKVKIYKHKHKTDLTKLKNVIKKHFPKDYKVGYNKNEKNNNNSGYVGVCKTKSKKLIINNSVNQEDF
sth 319 SAMIKRYNEHKEDLALLKE YIRNII SLKTYNEVFKDD....TKNGYAGYI.....DGKTNQEDF
smu 319 ASMIQRYNEHQMDLAQLKQFIRQLSDKYNVEFSDV....SKDGYAGYI.....DGKTNQEAFF
sag 320 ASMIQRYDEHRDLKQLKQFVRRASLPEKYEIFFADS....SKDGYAGYI.....EGKTNQEAFF
spy 319 ASMIKRYDEHHQDLTTLKALVRRQQLPEKYEIFFDQ....SKNGYAGYI.....DGGASQEEFF

```

deletions in the alpha-helical lobe of AnaCas9

```

Ana 215 .....LHQSNDANRIRKICARQGV...SPDVCQQLL
Nme 203 .....FSRKDLQAEILLLEFKQKQFGNPHVSGGLK
cje 195 .....IAQSFLKDELLKFLQKQRFEGFSSFKKFF.E
rde 380 YKFLKTLILSAKSEIKEVNDILTEIETGTFLPKQISKSNAEIPYQLRKMMELEKILSNAEKH.FSFLKQKDE
sth 373 YVYLKLLAEF...EGADYFLEKIDREDFLRKQRTFDNGSIPYQIHLQEMRAILDKQAKF.YPFLAKNK.
smu 373 YKYLKGLLNKI...EGSGYFLDKIEERDFLRKQRTFDNGSIPHQIHLQEMRAIRRQAEF.YPFLADNQ.
sag 374 YKYLKLLTKQ...EDSENFLEKIKNEDFLRKQRTFDNGSIPHQVHLTELKAIIRRQBEF.YPFLKDNQ.
spy 373 YKFIKPILEKM...DGTEELLVKLNREDLLRKQRTFDNGSIPHQIHLGELHAILRRQEDF.YPFLKDN.

```

deletions in the alpha-helical lobe of AnaCas9          PAM binding loop in SpyCas9

```

..... 000..... 000
Ana 243 ..... RAV..... FKADSPRGSADV..... SRVAPDP
Nme 233 ..... EGI..... ETLLMTQRPAL..... SGDAVQK
Cje 224 ..... EVV..... LSVAFYK..... R..... ALKDFSH
Tde 449 KGLSHSEKIIMLLTFKIPYIIGPINDNHKKFPDRCWVVKKEKSPSGKTPWNFFDHDKEKTAFAFITST
sth 438 ..... ERIEKILTFRIPYVYGPLARGNSDF..... AWSIRKR..... NEKITPWNFFEDVIDKESSAEAFINR
smu 438 ..... DRIEKILTFRIPYVYGPLARGKSD..... AWLSRKS..... ADKITPWNFFEDVIDKESSAEAFINR
sag 439 ..... DRIEKILTFRIPYVYGPLARGKSD..... AWMTTRKT..... DDSIRPWNFFEDVIDKESSAEAFIHR
spy 438 ..... EKI EKILTFRIPYVYGPLARGNSRF..... AWMTTRKS..... BETITPWNFFEEVVDKGS AQSFIER
..... 00000000

```

alpha-helical lobe

```

-----> 000000000000 -----> 0000000000 0000
Ana 264 LPFGQSFR... RRAPKCDPEFQRFRIISIVANLRIS ETKGENRPLTADERRHVVTFLTEDSQAADLTWVDV
Nme 254 MLGHC TFEPAE PKAAKN TYTAERFIWLT KLNLR ILEQGSERPLT DTERATLMDEPYRK.. SKLTYAQA
Cje 242 LVGNC SFFTDE KRAPKN S LAFMFVALTRIINLLNNLKNTEGILYTDKDLNPLNEV LKN.. GPTYKQT
Tde 519 RTNFC TYLVGE SVLPKSS LLYSEYTVLNEINNLI IDGK... N ICDIKLKQKIYEDLFKKY KKITQKI
sth 495 MTSFD LYLPEE KVLPKHS LLYETFNVYNELTKVRFI AESMRDYQFLDSKQKDIIVRLYFKDK RKVTDKDI
smu 495 MTNYD LYLPNQ KVLPKHS LLYEKFTVYNELTKVYKTEQG.KTAFDDANMKQEIFDGVFKVYRKVTDKDL
sag 496 MTNND FYLPEE KVLPKHS LLYEKFTVYNELTKVYKNEQG.ETYFFDSNIKQEIFDGVFKVYRKVSKKLL
spy 495 MTNFD KNLPNE KVLPKHS LLYEYFTVYNELTKVYVTEGMRKPAFLSGEQKKAIVDLFKVTNRKVTVKQL
-----> 0000000000 -----> 0000000000 00

```

alpha-helical lobe

```

0000 000 -----> 00000000 0000... 000 0
Ana 330 AEKLGVHRRD..... LRGTAVHTDDGER SAA RPPI DATDRI MRQT KISS LKT... WWE.. EADSEQRG
Nme 321 RKLGLGLD TA..... FFKGLRYGKDAEAST LMEMKAYHAI SRALEKEGLDKKSPNLS PELQDEIG
Cje 310 KKLGLS DDDY..... EFKGEK..... G TY. FIEFKKYKFEIKALGEHNLS..... QNLNEIA
Tde 586 STFIKHSGICNKTDEVI IIGI..... D..... KCTSSLKSYIELKNIFGK.. QVDEIS..... TKMNEEII
sth 565 IEYLHAIY.GY.. DGIE LKGI..... D..... EKQFNSSLTYHDLNLINIDKEFLDSS... N EAIIEEII
smu 564 MDFLEKFEDEF.. RIVDLTGHL..... D.KENKVFNASYGT YHDLCKIL.DKDPLDN SK... N EKILEDIV
sag 565 LDFLAKFEYEEF.. RIVDVI GL..... D.KENKAFNASLGT YHDLCKIL.DKDPLDN P... N ESILEDIV
spy 565 KEDYFKLIECF.. DSVE ISGV..... E DDFNASLGT YHDLCKIKDKDPLDN EE... N EDILEDIV
00000 0000000000 0000 00... 0000000000

```

alpha-helical lobe

```

00000000 -----> 0000 -----> 000000000000
Ana 388 AMIRYLYEDPTD... SECAE.. IIAELP EEDQAKLDSLHLPAGRAAYSRESLTA LSHMLATTT.....
Nme 384 TAFS LFKTDED... IT.GRL.. KDRIQP EILEALLKHISFDK.FVQISLKALRRIITPLME.QG.....
Cje 357 KDIT LKDEIK... LK.KAL.. AKYDLP QNQDLSL KLEFKD.HLNISFKALKIITPLML.EG.....
rde 642 RWAT IYDEGEKTI LKTKIKAEYGYCS DEQIKKILNLKFSG.WGRLSRKPLET VTSMPGFS EPVNI I
sth 620 HTLT LPEDREM... IK.QRLSKFENIFD KSVLKKLSRRHYTG.WGKLSAKLINGIRDKESGNITLDYLI
smu 622 LTLT LPEDREM... IR.KRLNYSDDLTKQVKKLRRHYTG.WGRLSAELIHGIRDKESRKTITLDYLI
sag 623 QTLT LPEDREM... IK.KRLNYSDDLTKQVKKLRRHYTG.WGRLSAKLINGIRDKESQKTITLDYLI
spy 621 LTLT LPEDREM... IE.ERLKTYAHLFD DKVMKQLRRHYTG.WGRLSRKLINGIRDKESQKTITLDFLK
0000.0 000... 00. 000000 0000000000 -----> 0000 000000

```

alpha-helical lobe          RuvC-II

```

00000000 -----> 00000000000000000000
Ana 446 ...DDLH EARKRLFGVD..... DSWAPP... AEATNAPVGNESVDRTLKI VGRYLSAVES
Nme 439 ...KRVEACA EYGDHY..... GKKNTEKIYLP... PIPADEIRNEVVLRALIS QARKVINGVVR
Cje 412 ...KRYEAYNELNLKVA..... INEDKDFLPA.FNETYKKEVTNVPVLRALIK EYRKVLNALLK
Tde 710 TAMRE TQNNLMELLS.SEFTFTENIKKINS GPEDA EKQFSYDGLV KPLFLSPVKKMLWQTLKIVKEISH
sth 684 DDG.I SNRNF MQLIHDDALSFKKKIQKAQ IIGDE.. DKGNIKEVVKSLPGSPA IKKGLISIKIVDELVK
smu 686 DDG.N SNRNF MQLIHDDALSFKKEIAKAQVIGET.. D.. NLNVVSDIAGSPA IKKGLISLKIIVDELVK
sag 687 DDG.R SNRNF MQLIHDDGLSFKSIISKAQAGSHS.. D.. NLKEVVGELAGSPA IKKGLISLKIIVDELVK
spy 685 SDG.F ANRNF MQLIHDDSLTFKEDIQKAQV SQG.. D.. SLHEHTANL AGSPA IKKGLISLKVIVDELVK
000000 000000000000 000000 0000000000000000

```

RuvC-II          HNH domain

```

00 -----> 0000000000000000000000000000 00.....
Ana 495 MWG... TPEVIHVEHVRDGFTE RMADERDKANRRRYNDNQEAMKKIQRDYG.KEGYISRG.....
Nme 494 RYG... SPARIHIEHETAREVGKSKDRKEIEKRQENRDKDREKAAAKFREYFPNFV GEPKSK.....
Cje 469 KYG... KVKKINILAREVGNHSQRAKIEKEQENNYKAKKDAE LCE... KLGLKINSK.....
Tde 779 ITQ.A PPKKTFIEMAKGALEPARTKTRLKIQDLY... NNCKN... DADAFSEI.. KDLSGKIENED
sth 751 VMGGRKPESIVVEMARENQYTNQKNSSQRLKRL... KSLKE... LGSKILKENIPAKLSKID
smu 751 IMG.H QPENIVVEMARENQFTNQGRRNSQRRLKGLT... DSIKE... FGSQILKHE... PVE
sag 752 VMG.Y EPEQIVVEMARENQFTNQGRRNSQRRLKGLD... DGVKN... LASD LNGILK EY... PTD
spy 750 VMGRHKPENIVVEMARENQFTQKQGKNSRQRMLIE... EGIKE... LGSQILKHE... PVE
0 -----> 000000000000..... 000

```

HNH domain

```

..... 0000000000 -----> -----> 000 -----> 00000000
Ana 552 ... D I V R L D A L E I Q G C A C I Y C G T T G Y H T C ... Q I D H I V P Q A G P G S N N R R G N L V A V C E R C N R S K S N
Nme 552 ... D I L K L R L Y E Q O H G K C L Y S G K E I N L G R L N E K G Y V E I D H A L P F S R T W D D S F N N K V L V L G S E N Q N K G N Q
Cje 523 ... N I L K L R L F K E Q K E F C A Y S G E K I K I S D L Q D E K M L E I D H I Y F S R S F D D S Y M N K V L V F T K Q N Q E K L N Q
Tde 839 N L R L R S D K L Y L Y T O L G K C M Y C G K P I E I G H V F D T S N Y D I D H I Y P Q S I K D D S I S N R V L V S S C S N K N K E K D
sth 810 N N A L Q N D R L Y L Y L O N G K D M Y T G D D L D I D R ... L S N Y D I D H I I P Q A F L K D N S I D N K V L V S S C S N K N G K S D D
smu 803 N S Q L Q N D R L F L Y Y L O N G R D M Y T G E E L D I D Y ... L S Q Y D I D H I I P Q A F I K D N S I D N R V L T S S K E N R G K S D D
sag 808 N Q A L Q N E R L F L Y Y L O N G R D M Y T G E A L D I D N ... L S Q Y D I D H I I P Q A F I K D D S I D N R V L V S S A K N R G K S D D
spy 803 N T Q L Q N E K L Y L Y L O N G R D M Y V D P E L D I N R ... L S D Y D V D H I V P Q S F L K D D S I D N K V L T R S D K N R G K S D N
00000000 -----> -----> 000 -----> 000000

```



**HNH domain**

Ana 612 TPFVAVWAQKCGIPHVGVKEAIGRVRGWRKQTPTNS...SEDLTRLKKEVI.ARLRRTQEDPEIDERISM  
 Nme 618 TPYEYFNGKD...N.SREWQEFKARVE...TSRFPKSKKQRILLQKF...DEDDGFKBRNL  
 Cje 589 TPFEAFGND...S.AKWQKIEV...L.AKNLPFKKQKRILDKNYKDKQKDFKBRNL  
 Tde 909 YPLKSEIQSK...R.QGFPWNFLQRNNFISLEKLNRLTRAT...PIISDDETAKFIARQL  
 sth 877 VPSL.EVVKK...R.KTFWYQLLKSLLISQRKFDNLTKAERG...GLSPEDKAGFIQRQL  
 smu 870 VPSK.DVVRK...M.KSYWSKLLSAKLITQRKFDNLTKAERG...GLTDDDKAGFIQRQL  
 sag 875 VPSL.EIVKD...C.KVFWKLLDAKLMSQRKYDNLTKAERG...GLTSDDKARFIQRQL  
 spy 870 VPSE.EVVKK...M.KNYWRQLLNKALITQRKFDNLTKAERG...GLSELDDKAGFIQRQL

**RuvC-III**

Ana 676 ESVAWMANEELHHRIAAAY...P.ETTVMVYRGSITAAARKAAGIDSRINLIGEKKG  
 Nme 668 NDTRVYVNRFLCQFVADRMRLTG...K.GKKRVFASNGQITNLDLRFW...GLR  
 Cje 638 NDRYIARLVNLNYTKDYLDLPLSDDENTKLNLDTKQKGSKVHVEAKSGLMSTADRTHTW...GFS  
 Tde 960 VETROATKVAAKVLEKMF...E.TKIVYSKAETVSMFRNKF...DIV  
 sth 929 VETROITKHVARLLDERFNNE...K.DENN...AVR.VKIITLKSSTLVSPFRKDF...ELY  
 smu 922 VETROITKHVARLLDERFNNE...T.DENN...KIR.QVKIVTLKSNLVSNERKEF...ELY  
 sag 927 VETROITKHVARLLDERFNNE...L.DSKGR...RIR.QVKIVTLKSNLVSNERKEF...GFY  
 spy 922 VETROITKHVARLLDERFNNE...Y.DENDK...LIR.EVKIVTLKSKLVSNERKDF...QFY

**RuvC-III**

Ana 727 RKRDRIDRRHHAVDASVVALMEASVAKTLAERSLIRGEOQLTGKEQTPWKQYTG...S...TVGA.  
 Nme 714 KVRARENDRHHAIDAVVVVACSTVAMQQKITRFVRYKEMNAFDGKT.IDKETG.E...V...LHKK.  
 Cje 698 AKDRNHLHHAIDAVIIAYANNSIVKAFSDFKKEQESNSAEL...D...YKKN.  
 Tde 1001 KCREINDFHHAHDAYLNIIVGNVYNTKFTNPNWN...F.IKEK...R...DNP.KIADT  
 sth 981 KVRINDFHHAHDAYLNAVIVASALLKYPLEPE...F.VYGD...YPKYNSFR...ERKSAATEKV  
 smu 974 KVRINDYHHAHDAYLNAVIGKALLGVYPLEPE...F.VYGD...YPHFHGHK...ENK.AIAKK  
 sag 979 KIRVENVYHHAHDAYLNAVIVAKAILTKYPLEPE...F.VYGD...YPKYNSYK...TRKSAATEKV  
 spy 974 KVRINDYHHAHDAYLNAVIVGTALIKKYPKLESE...F.VYGD...YKVYDVRKMIASEQEIGKATKAY

**RuvC-III**

Ana 784 REHFEMWRGHMLHLT.ELF...NERLAE...DKVYVTQNIIRLRLS  
 Nme 770 THFPQPWFEEFAQEVMIKRVFGKPDGKPEFEEADTPEKLRLLAEKLSRPEAVHEYVTPLFVSRAPNRKM  
 Cje 753 RKFPEFSSGFRQK...VLDKDEIFVSKPERRKP.  
 Tde 1049 YNYXVFDY...DVKRNNITA.WEKGKTIITVKDMLKRNTPLYTRQAACKKG  
 sth 1037 YFYSNIMNIFKKSISLA.DGRVIERPLIEVNEETGESV.WNKESDLATVRRVLSYQVNVVKKVEQNH  
 smu 1029 FFYSNIMNFFKDDV...R.DTKNGEII.WKKDEHISNIKKVLSYQVNIIVKVEQNG  
 sag 1035 FFYSNIMNFFKTKVTLA.DGTVVVVDIEVNNDTGEIV.WDKKKHFPATVRKVLSPYQVNIIVKKTETGT  
 spy 1037 FFYSNIMNFFKTEITLA.NGEIRKRPLIETNGETGEIV.WDKGRDFATVRKVLSPYQVNIIVKKTETGT

**beta-hairpin domain (insertion in AnaCas9)**

Ana 822 DGNHATVNPVSKLVSHRLGDLTVQQ...IDRACTPALWCALTRKDFDEKNGLPAREDR  
 Nme 839 SGQGHMETV.KSAKRLDEGVSVLRVPLTQLKLDKLEKVMNRREREPKLYEALKARLEAH...KDD  
 Cje 784 SGALHEETF.RKEEEFHQ...  
 Tde 1097 .ELFNQTI...M.KKG...  
 sth 1104 .GLDRGKP...KGLFNANLSS...KPKP...  
 smu 1083 .GFSKESI...L.PKG...  
 sag 1102 .GFSKESI...L.AHG...  
 spy 1104 .GFSKESI...L.PKR...

**beta-hairpin domain (insertion in AnaCas9)**      **PAM binding loop2 in SpyCas9**      **Topo**

Ana 878 AIRVHGHEIKSSDYIQVFSKRKKTDSDRDETPFGAIAVRGGFV...EI...GPSIHHRARIYRVBEGKPKP  
 Nme 899 P...AKAFA...EPFYKYDKAGNRTQQVKAVRV...EQVQKTGVVVRNHNHGI.  
 Cje 801 ...SYGKKEGLKALDEL...GKIRKVNKGI.  
 Tde 1108 ...LGQ.HPLKKEGPFNSISKYGYNKVSAAYYTLIEYEEKNKRISLRTIPL  
 sth 1125 ...NSNENL.VGAKEYLDPKKGYYAGISNSFTVLVKGTEIEGAKKKITNVLE  
 smu 1094 ...NSDKLIPRKTTFYWDTKKYGFDSPIVAYSILVIADIEKGSKKLITVKA  
 sag 1113 ...NSDKLIPRKTTDIYLDPKKYGFDSPIVAYSVLLVADIKKGAKQLLTVTE  
 spy 1115 ...NSDKLIARKK...DWDPKKYGFDSPPTVAYSVLLVAVKEKGSKKLITVKE

**Topo-homology domain**

Ana 940 VYAMLRVFTHDLSLQ...R.HG...DL.FSAVIPPQSI.SMRCAEPKL.RKAITFG...NATYL  
 Nme 942 .ADNATMVRVDVFE...K.G...DKYYLVP.IY...SWQVAKGLPDRRAVVQGKDE...E  
 Cje 825 .VKNQDMFRVDIFKH...K.KT...NK.FYAVP.IY...TMDFALKVLPNKAVVQGDKKKSGGLIK  
 Tde 1157 YLVKDIQKDDVVLKSYLTDLLGKKE...F.KILVP.KIKINSLKINGFPCHI...TGKTNDSFLL  
 sth 1174 FQGISILDRINVRKD.KLNFLLEKGYKDI.E.IIIELP.KYSLFELS...DGSRRMLASILSTNNKRGIEI  
 smu 1145 LVGYSIMKMTFERD.PVAFLERKGYRNVQENI.IKLP.KYSLFKLE.NGRKRLAS...AREL  
 sag 1164 LLGITIMERSRFEKN.PSAFLESKGYLNIRADKLIILP.KYSLFELS.NGRRLAS...AGEL  
 spy 1163 LLGITIMERSSFEKN.PIDFLEAKGYKEVKKDLIILP.KYSLFELS.NGRKRLAS...AGEL

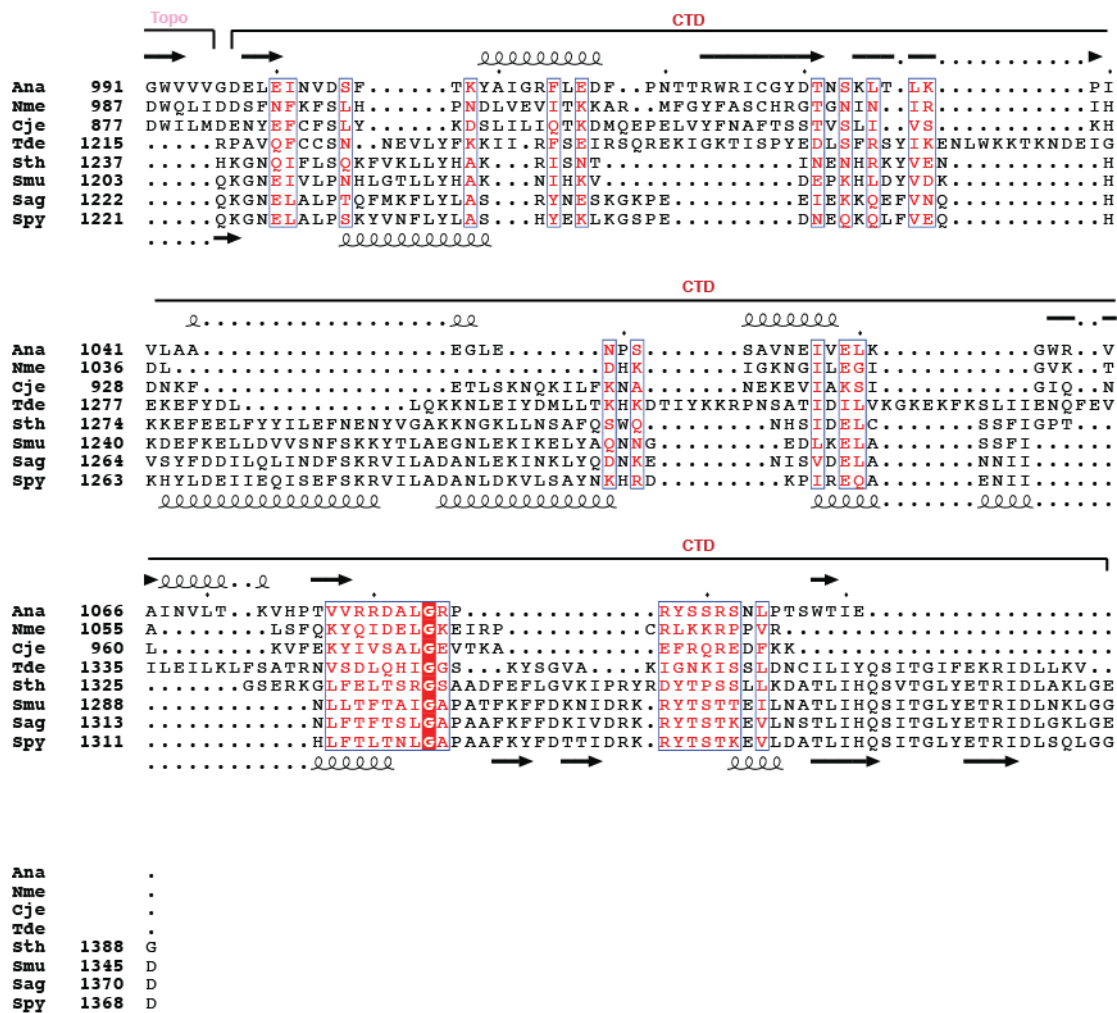

**Figure S7. Multiple sequence alignment of Type II-A and II-C Cas9 orthologs.** The primary sequences of Type II-C Cas9 orthologs from *Actinomyces naeslundii* (Ana), *Neisseria meningitidis* (Nme) and *Campylobacter jejuni* (Cje), together with type II-A Cas9 orthologs from *Treponema denticola* (Tde), *Streptococcus thermophilus* (Sth), *Streptococcus mutans* (Smu), *Streptococcus agalactiae* (Sag) and *Streptococcus pyogenes* (Spy) were aligned using CLUSTALW (85). The alignment was generated in ESPrnt (83) using default settings. Absolutely conserved residues are shown as white text on a red background, while similar residues are shown as red text with a white background. Red triangles indicate conserved residues in the RuvC active site, whereas conserved residues located in the HNH active site are denoted with a blue triangle. Green triangles indicates the tryptophan residues involved in PAM binding based on SpyCas9 crosslinking assay. The secondary structure of AnaCas9 derived from the crystal structure is marked on the top of the sequence alignment, whereas the secondary structure of SpyCas9 is shown at the bottom. Accession numbers for each Cas9 ortholog are as follows: Ana (*Actinomyces naeslundii* str. Howell 279, EJN84392.1), Nme (*Neisseria meningitidis*, WP\_019742773.1), Cje (*Campylobacter jejuni*, WP\_002876341.1), Tde (*Treponema denticola*, WP\_002676671.1), Sth (*Streptococcus thermophilus* LMD-9, YP\_820832.1), Smu (*Streptococcus mutans*, WP\_019803776.1), Sag (*Streptococcus agalactiae*, WP\_001040088.1), and Spy (*Streptococcus pyogenes*, YP\_282132.1).

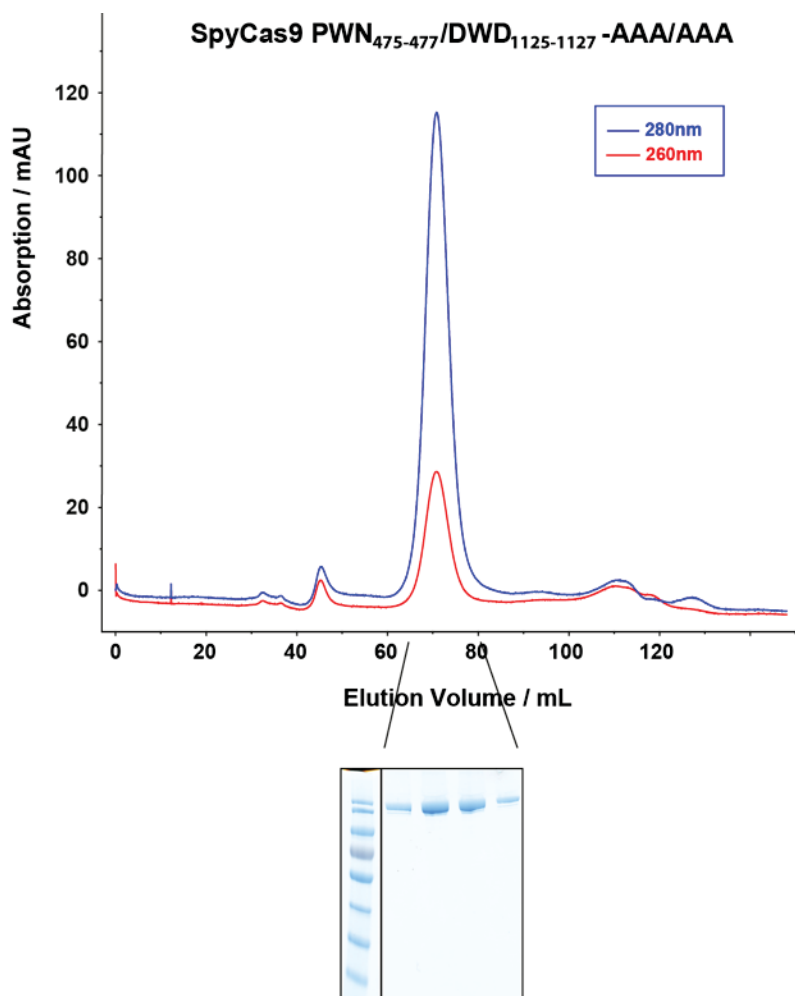

**Figure S8. Size exclusion chromatogram of SpyCas9 PWN<sub>475-477</sub>/DWD<sub>1125-1127</sub>→AAA/AAA mutant.** All SpyCas9 mutants in this study showed the same properties during purification as observed for the wild-type SpyCas9. The retention time during gel filtration chromatography on a Superdex 200 16/60 column (GE Healthcare) is comparable to WT SpyCas9 (8).

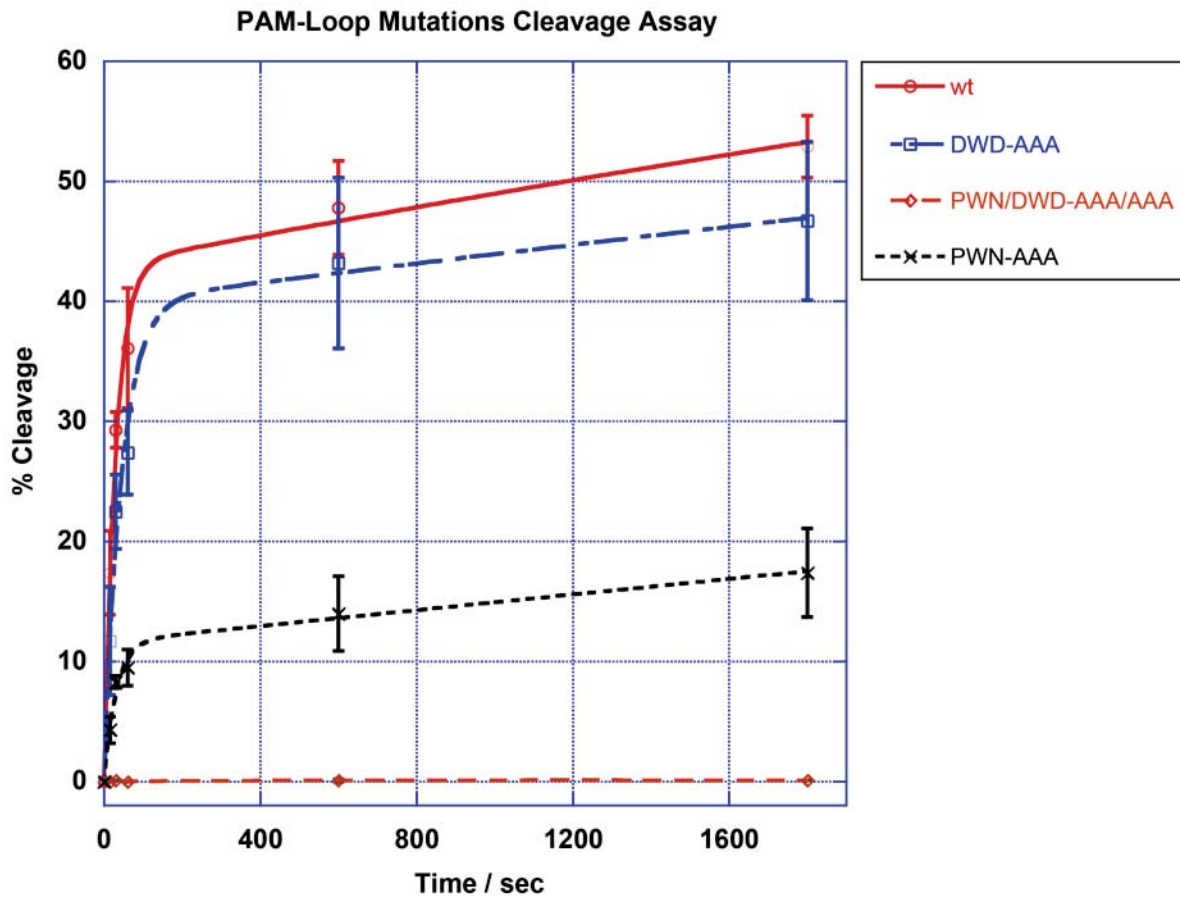

**Figure S9. Quantification of DNA cleavage experiments with PAM-binding mutants.** For cleavage experiments, 1 nM radiolabeled 55-bp dsDNA substrate was incubated with equimolar Cas9:RNA variants (wildtype, PWN<sub>475-477</sub>→AAA and/or DWD<sub>1125-1127</sub>→AAA/AAA) at room temperature. The reactions were quenched at various time points and resolved by 10% denaturing PAGE. DNA was visualized by phosphorimaging, quantified with ImageQuant (GE Healthcare), and analyzed with Kaleidagraph (Synergy Software). The results presented here show a decreased cleavage activity for the PWN<sub>475-477</sub>→AAA mutant, whereas SpyCas9 mutated in both regions leads to a severe defect in dsDNA cleavage.

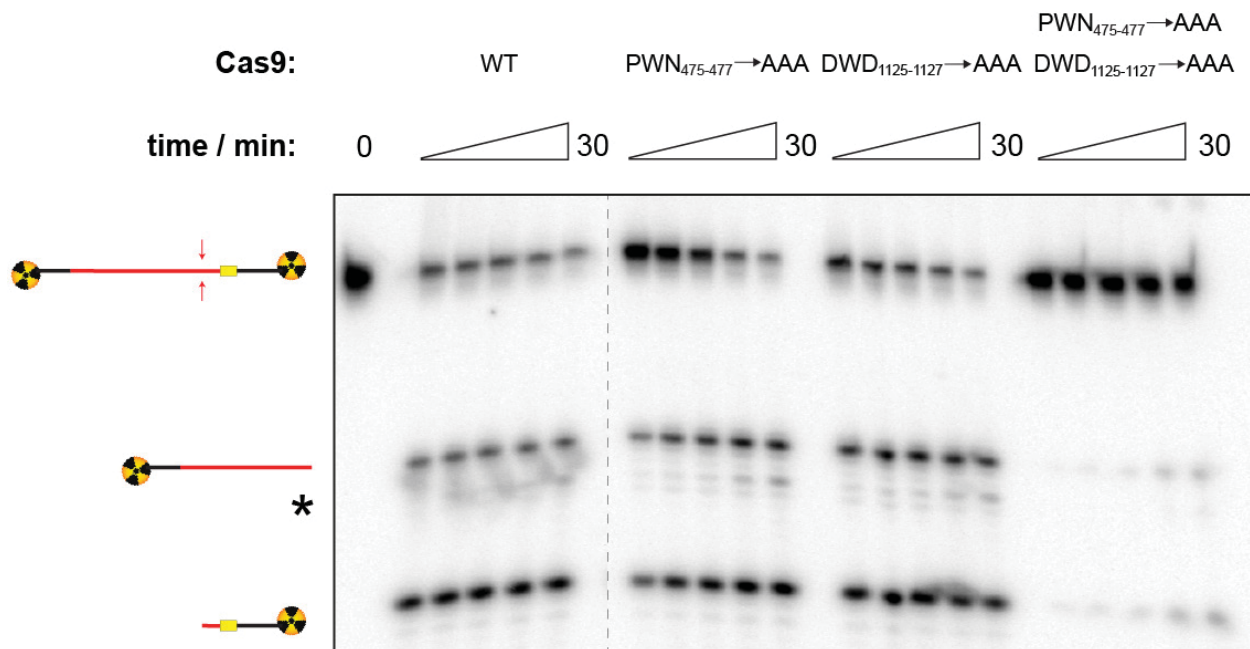

**Figure S10. SpyCas9 PWN<sub>475-477</sub>/DWD<sub>1125-1127</sub>→AAA/AAA mutant is impaired in dsDNA substrate cleavage.** In addition to equimolar cleavage conditions (Fig. 3D), reconstituted SpyCas9 variants were also tested at a 10-fold molar excess over dsDNA substrate concentration. Reactions contained 1 nM radiolabeled DNA substrate and 10 nM Cas9:RNA complex, and were conducted at room temperature. Aliquots were removed at 0.25, 0.5, 1, 10, and 30 minutes, quenched by mixing with formamide gel loading buffer containing 50 mM EDTA, and resolved by 10% denaturing PAGE. Reaction products were visualized by phosphorimaging.

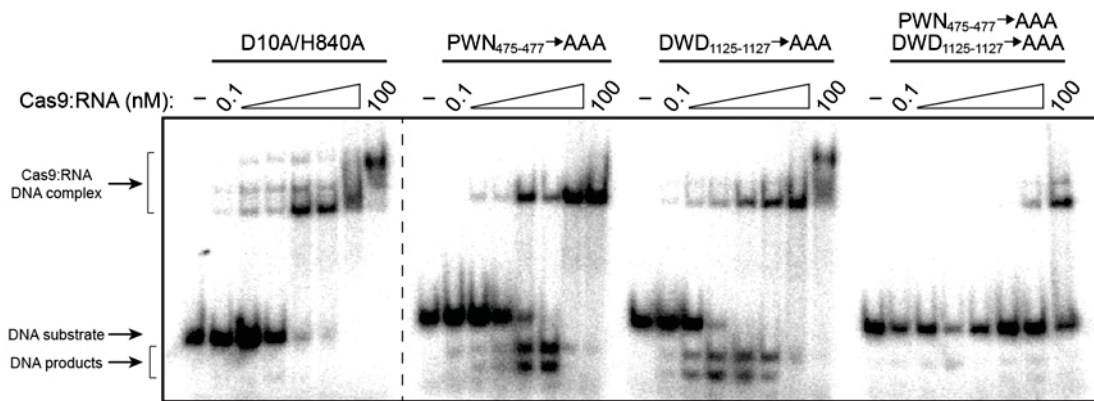

**Figure S11. SpyCas9 PWN<sub>475-477</sub>/DWD<sub>1125-1127</sub>→AAA/AAA mutant is impaired in dsDNA binding.** Target 55-bp dsDNA was incubated with increasing concentrations of the indicated Cas9:RNA mutants for 60 min before being resolved by 5% native PAGE. SpyCas9 mutated individually at PWN<sub>475-477</sub>→AAA or DWD<sub>1125-1127</sub>→AAA/AAA binds dsDNA with an affinity similar to catalytically inactive dCas9 (D10A/H840A), whereas SpyCas9 mutated in both regions is defective in dsDNA binding. Note that unbound DNA cleavage products exhibit a distinct mobility from intact substrate DNA.

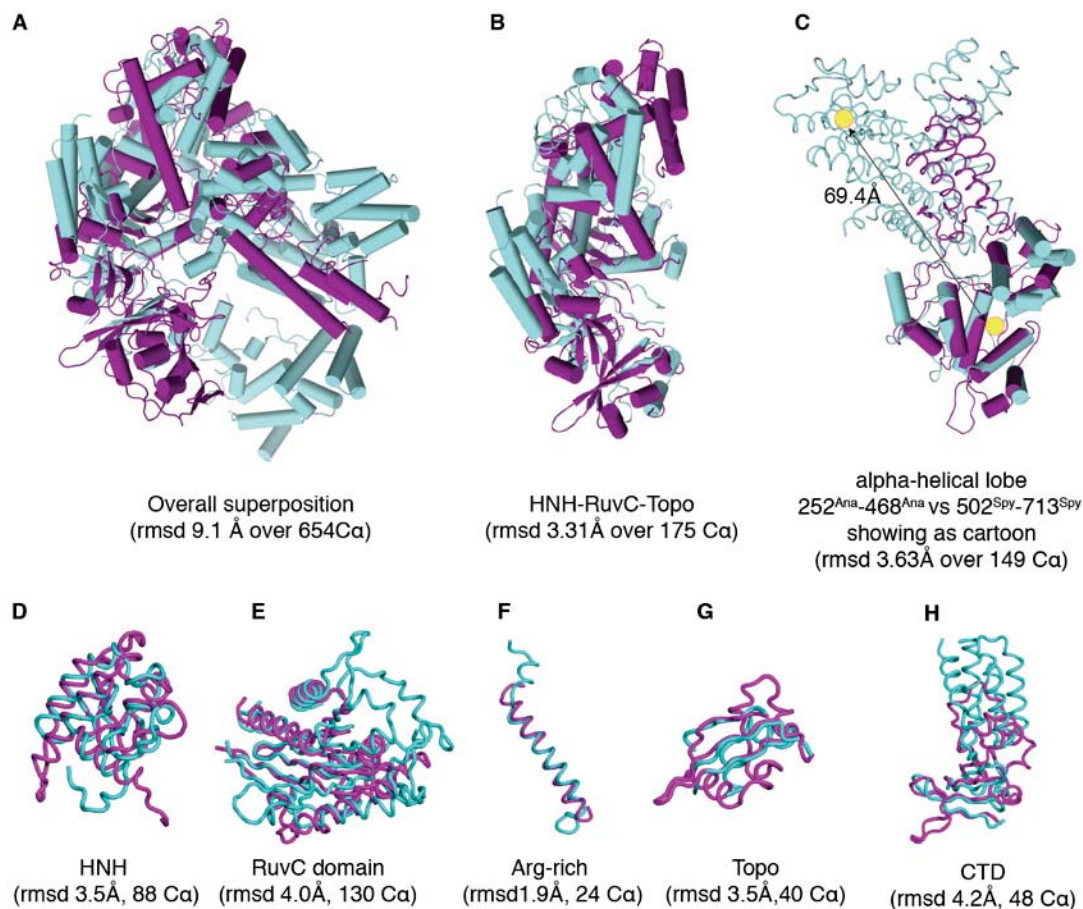

**Figure S12. Pairwise structural comparisons of SpyCas9 and AnaCas9.** (A) Overall structural alignment of AnaCas9 (purple) and SpyCas9 (cyan) showing a good alignment of the nuclease lobe but distinct structural features in the alpha-helical lobe. The superpositions were generated using the jCE algorithm (<http://source.rcsb.org/jfatcatserver/>). (B) Superposition of the catalytic core. For clarity, the alpha-helical lobe is not shown. (C) Superposition of the alpha-helical lobe, revealing structural similarity between 252<sup>Ana</sup>-468<sup>Ana</sup> and 502<sup>Spy</sup>-713<sup>Spy</sup>, with a large displacement of 69.4 Å towards the RuvC domain and an approximately 35° rotation about the junction between two domains in AnaCas9. The putative domain centers are labeled with yellow circles. (D-H) Individual domains of AnaCas9 superimposed onto the corresponding domains in SpyCas9 with root mean square deviation (rmsd) values for the equivalent alpha-carbons indicated.

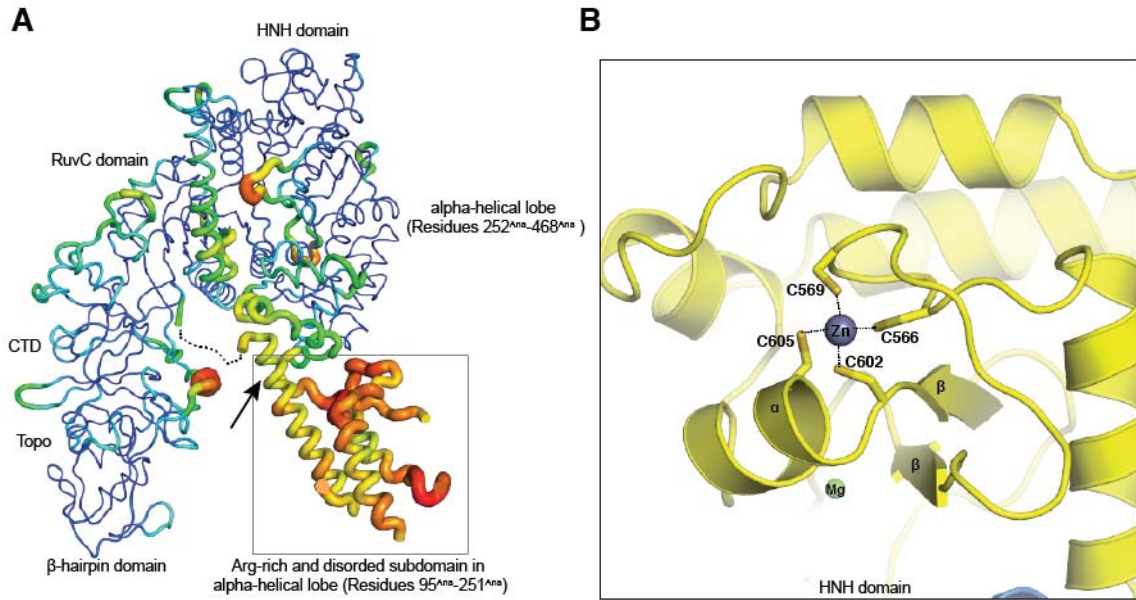

**Figure S13. (A) AnaCas9 displayed by B-factor putty.** Thin blue loops represent low B-values, while broad red tubes represent high B-values. The Arg-rich region and the neighboring alpha-helical part (box) have the highest B-factors in the structure, suggesting high flexibility in these regions. The hinge connecting the RuvC domain and the Arg-rich region is drawn as a dotted line. **(B) Close-up view of the zinc-binding site in the HNH domain of AnaCas9.** The zinc site is coordinated by residues C566<sup>Ana</sup>, C569<sup>Ana</sup>, C602<sup>Ana</sup> and C605<sup>Ana</sup>, and may serve to stabilize the AnaCas9 HNH domain architecture ( $\beta\beta\alpha$ -Me fold).



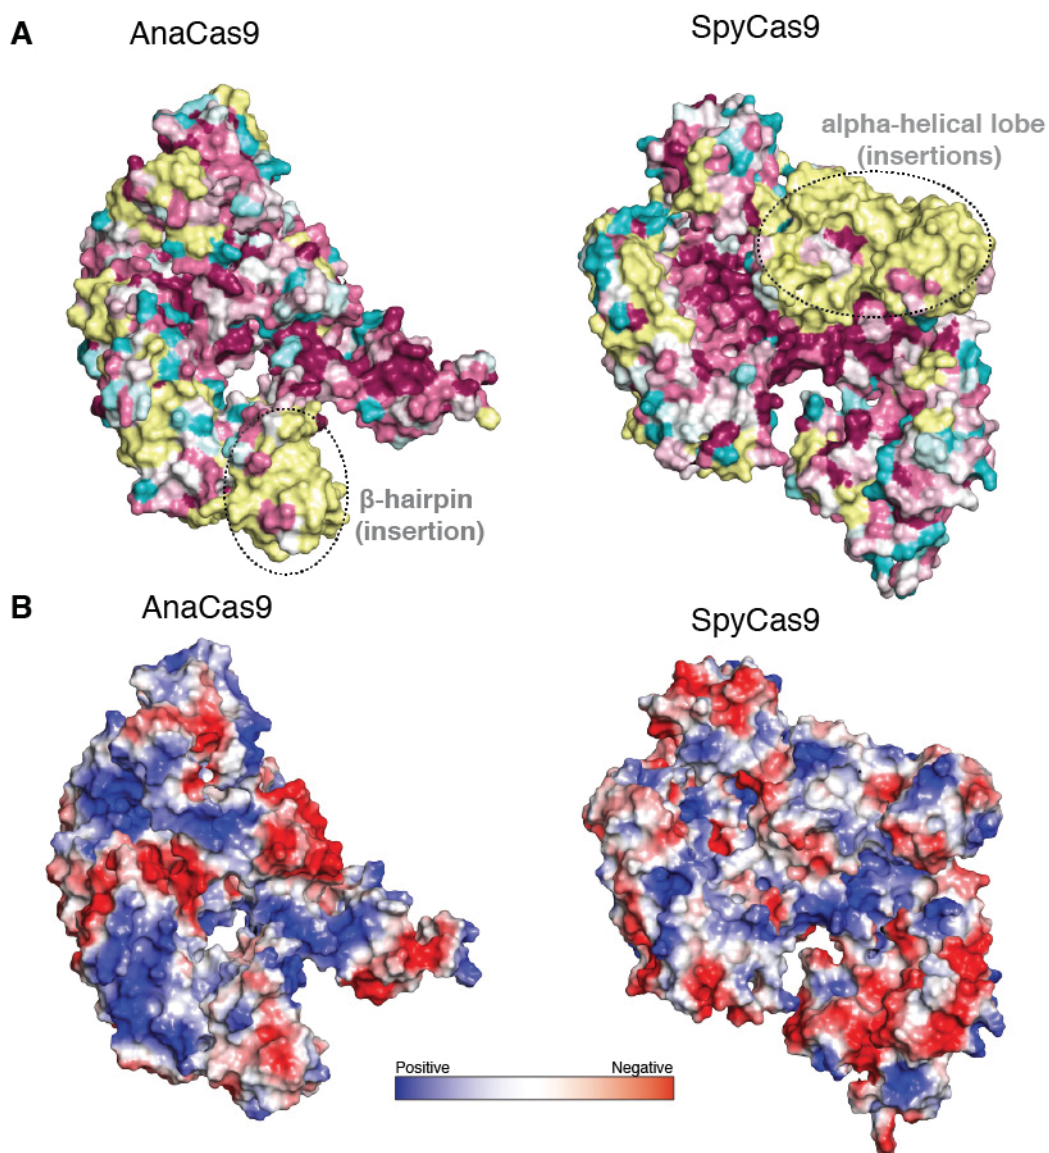

**Figure S14. Surface features of SpyCas9 and AnaCas9 based on sequence conservation and electrostatic potential.** (A) Surface conservation of AnaCas9 (left) and SpyCas9 (right), with the same orientation as in Fig 4. The surface is colored according to amino acid conservation among the Type-II Cas9 proteins shown in Fig. S7 by the ConSurf Server (61), where purple/red represents highly conserved residues, while yellow/light green denotes the most variant residues in Type-II Cas9 orthologs. Notably, AnaCas9 harbors a  $\beta$ -hairpin domain insertion, whereas SpyCas9 has a large insertion in the alpha-helical lobe. (B) The same molecular surface representations of AnaCas9 (left) and SpyCas9 (right) are color-coded by electrostatic potential, as calculated by APBS (60) electrostatics in PyMOL (The PyMOL Molecular Graphics System, Version 1.5.0.4 Schrödinger, LLC).

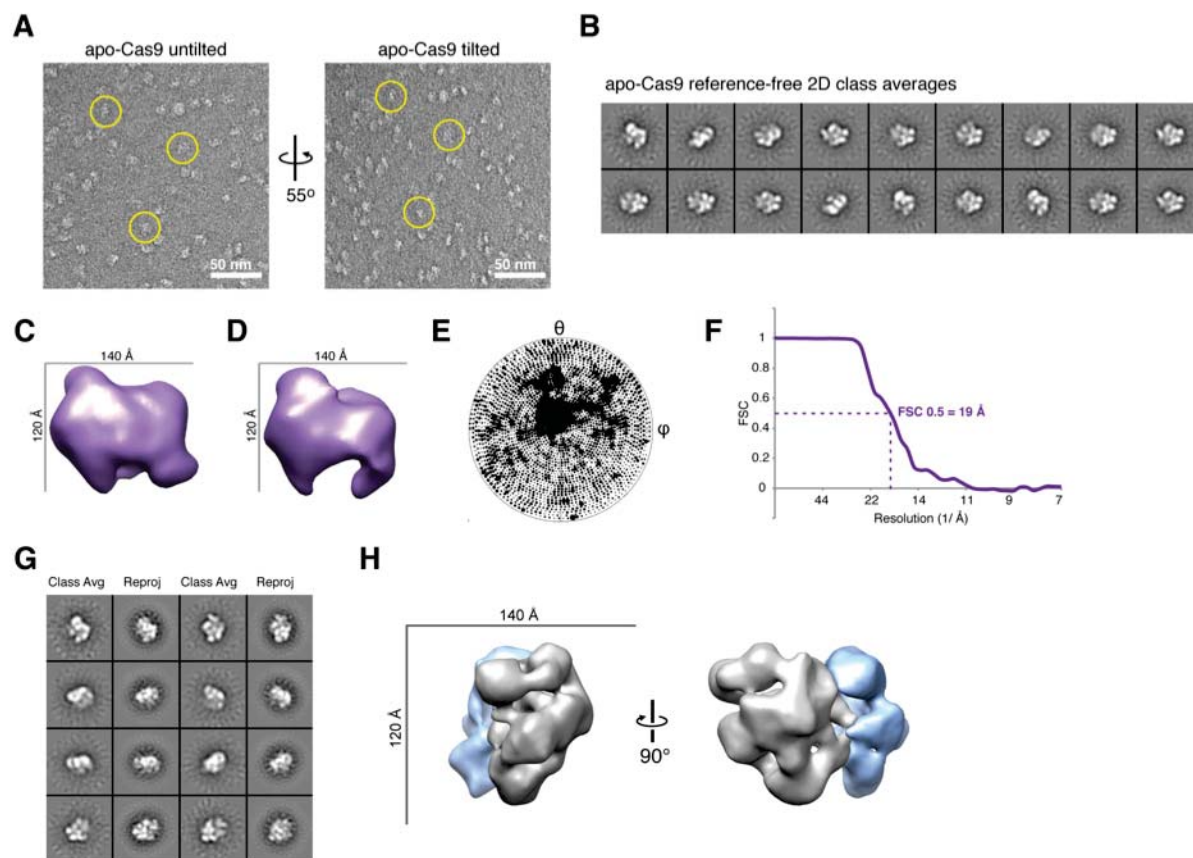

**Figure S15. Molecular architecture of apo-SpyCas9.** (A) Representative untilted (left) and tilted (right) micrographs of negatively stained apo-SpyCas9. Scale bar indicates 50 nm. (B) Reference-free 2D class averages of apo-SpyCas9. The width of the boxes is  $\sim 316$  Å. (C) Random conical tilt (RCT) class volume showing the *ab initio* structure of apo-SpyCas9. (D) Initial model generated by assigning Euler angles of the reference-free class averages with respect to the RCT volume. This initial model was used for refinement of the raw particle images of apo-SpyCas9. (E) Euler angle distribution for the final reconstruction. (F) Fourier shell correlation (FSC) curve for the final reconstruction, showing the resolution to be  $\sim 19$  Å using the 0.5 FSC criterion. (G) Reference-free 2D class averages of apo-SpyCas9 (first and third columns) matched to reprojections of the final reconstruction (second and fourth columns). The width of the boxes is  $\sim 316$  Å. (H) Final reconstruction of apo-SpyCas9 using the map in (D) as the initial model for refinement. The final map is segmented and colored as in Fig. 5A.

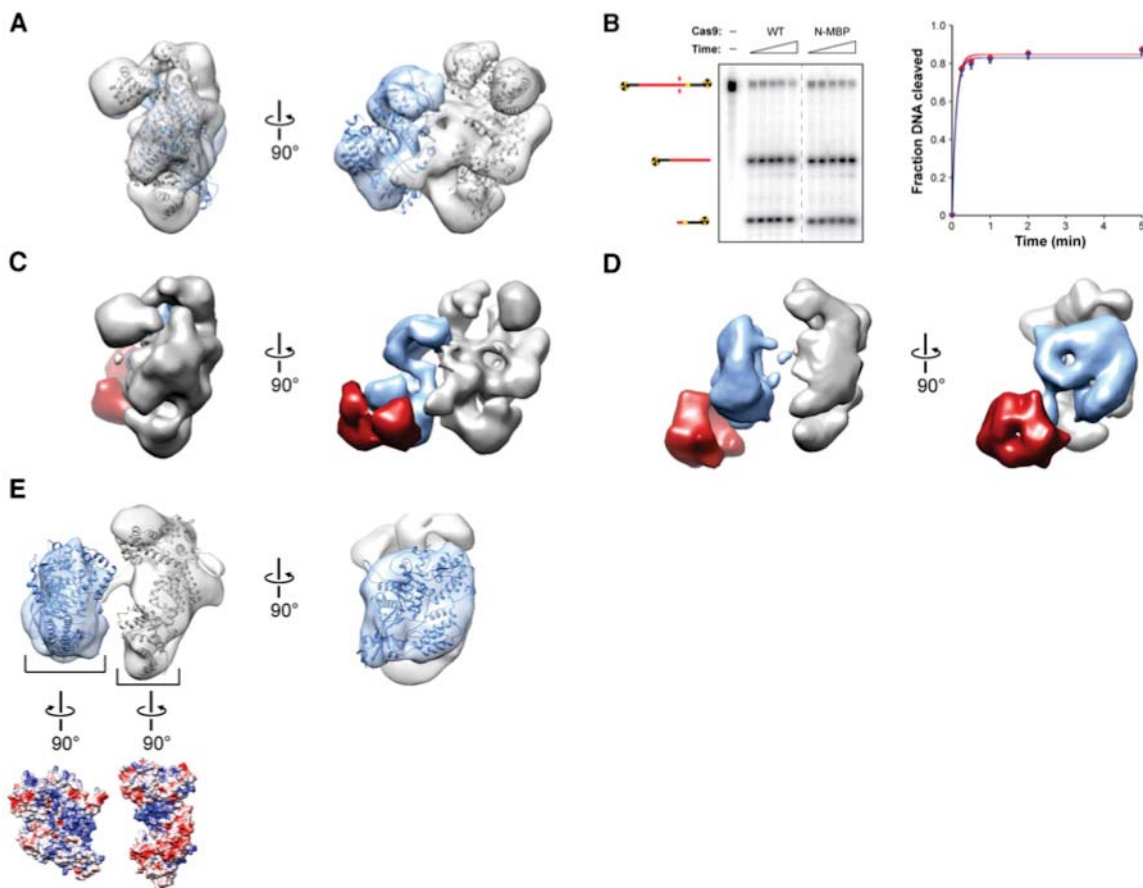

**Figure S16. Structural similarities between the apo-SpyCas9 EM structure and X-ray crystal structure.** (A) The X-ray crystal structure of SpyCas9 was split into the alpha-helical lobe (residues 66-713) and the RuvC nuclease-containing lobe (residues 1-65 and 744-1363). Both lobes were computationally docked into the apo-SpyCas9 EM density as separate rigid bodies using SITUS (86), due to flexibility in the RuvC nuclease-containing lobe (blue) in the absence of bound nucleic acids (see Fig. S1B, blurry, smaller lobe in class averages). The HNH domain was excluded from docking for the same reason. (B) Activity assay with WT and N-MBP SpyCas9. DNA cleavage experiments were performed and resolved by 10% denaturing polyacrylamide gel electrophoresis (left). The data were plotted (right) and fit with single-exponentials (solid lines); error bars represent the standard deviation from three independent experiments and are not always visible. (C, D) 3D difference maps ( $> 7\text{-}\sigma$ ) (red density) between the N-terminal MBP-labeled and unlabeled reconstructions of apo-SpyCas9 (C) and SpyCas9:RNA:DNA (D) were mapped onto the corresponding unlabeled reconstructions. (E) The X-ray crystal structure of SpyCas9 was again split into the alpha-helical lobe and nuclease-containing lobe and both lobes were computationally docked into the SpyCas9:RNA:DNA EM density as separate rigid bodies using SITUS (86) (top). This docking result is consistent with a  $100^\circ$  rigid body rotation of the nuclease lobe toward the alpha-helical lobe and places the two nucleic acid binding clefts across from one another (electrostatic surface potential, below). Further experiments and/or higher-resolution structures will be required to verify this working model.

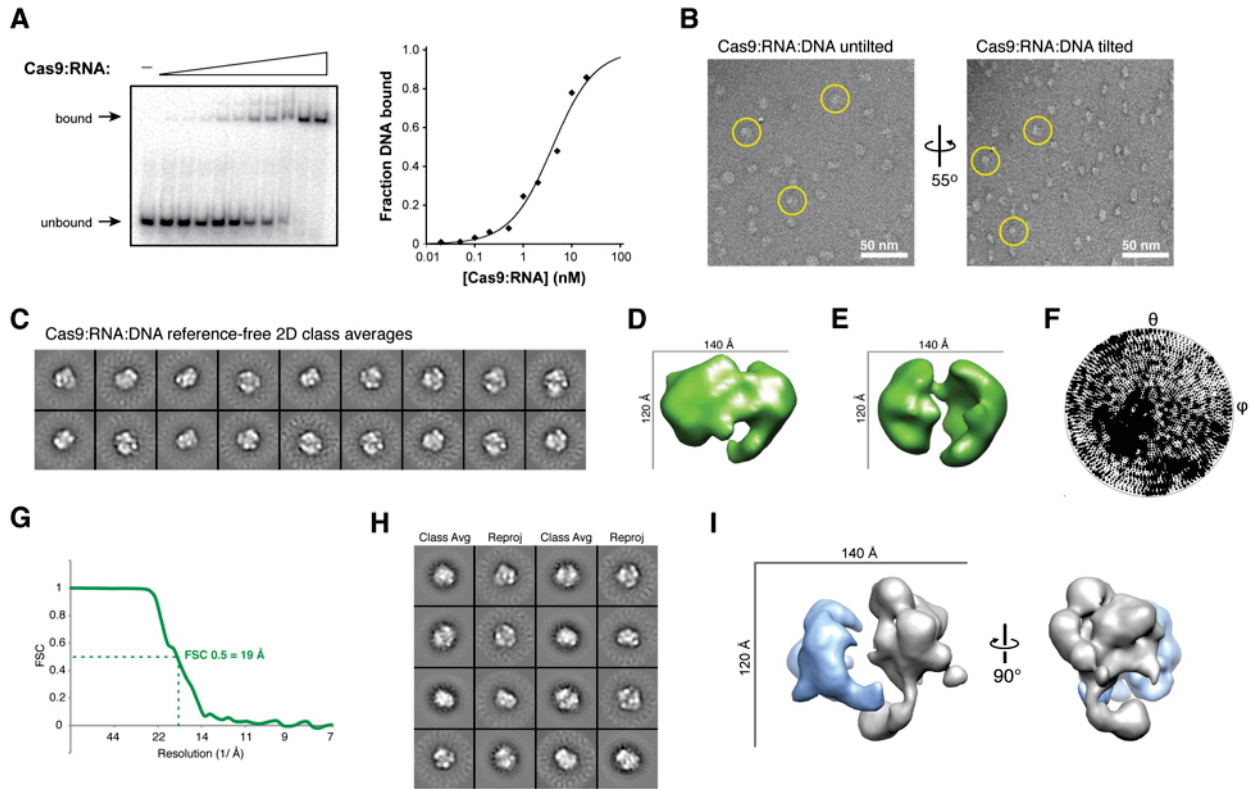

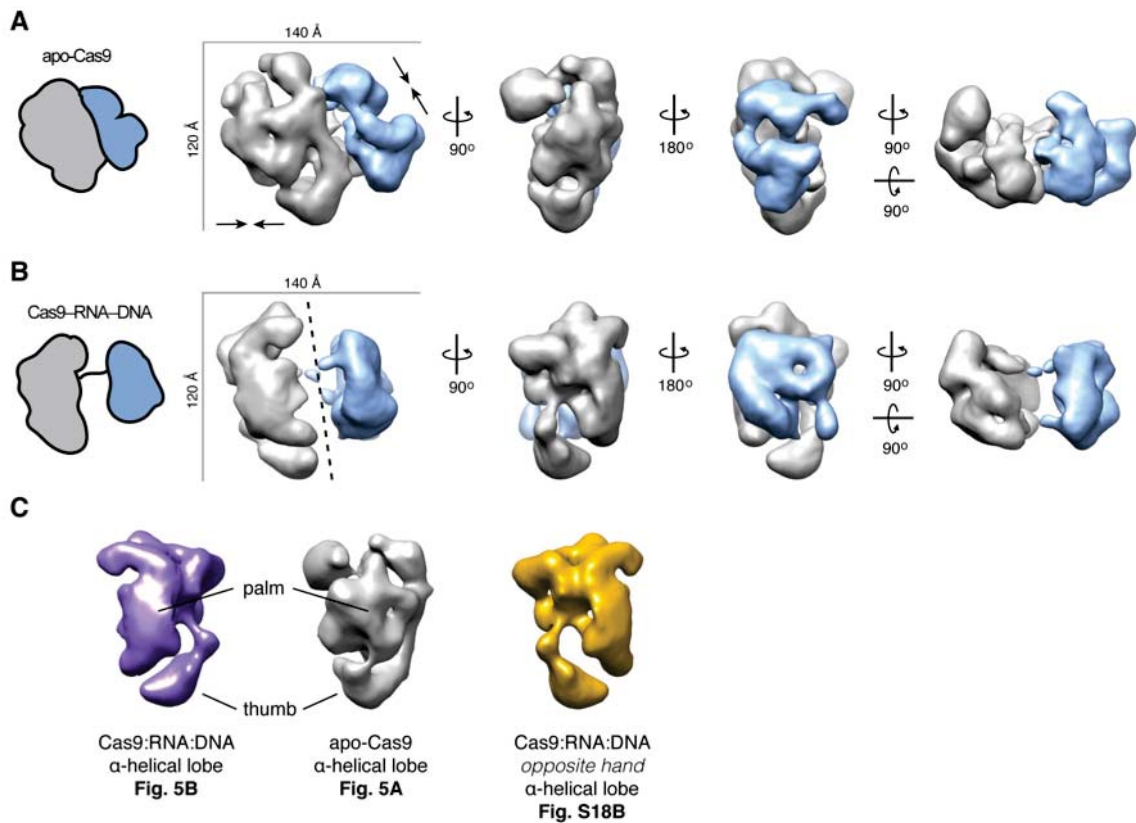

**Figure S18. Alternative model for the conformational change in SpyCas9:RNA:DNA complex considering the opposite handedness.** (A, B) Single particle EM reconstructions of negatively stained apo-SpyCas9 (A) (as in the main text) and SpyCas9:RNA:DNA (B) with opposite handedness as the structure presented in Fig. 5B. Cartoon representations are shown on the left. In this alternative model, the movement of the smaller lobe with respect to the larger one is subtler. The blue lobe rotates in towards the larger lobe and reorganizes to form the central channel spanning the length of the enzyme (black dashed line). Note that the grey lobes of the two structures are aligned differently than the alignment in the main text, to maintain the blue lobe in a similar relative position for the two structures. (C) From left to right: the  $\alpha$ -helical lobe of SpyCas9:RNA:DNA from Fig. 5B (purple), apo-Cas9 (grey), and Cas9:RNA:DNA with opposite handedness from (B) (gold), aligned to one another based on optimal cross correlation coefficient (CCC). The favored model presented in Fig. 5B of the main text is based on the more obvious, direct correspondence between the features of the apo-SpyCas9  $\alpha$ -helical lobe (grey) and the SpyCas9:RNA:DNA  $\alpha$ -helical lobe (purple). Additionally, the  $\alpha$ -helical domain from the crystal structure exhibits a higher CCC with the  $\alpha$ -helical lobe from the model presented in Fig. 5B of the main text (purple) than the  $\alpha$ -helical lobe of opposite handedness (gold) (0.83 versus 0.74).

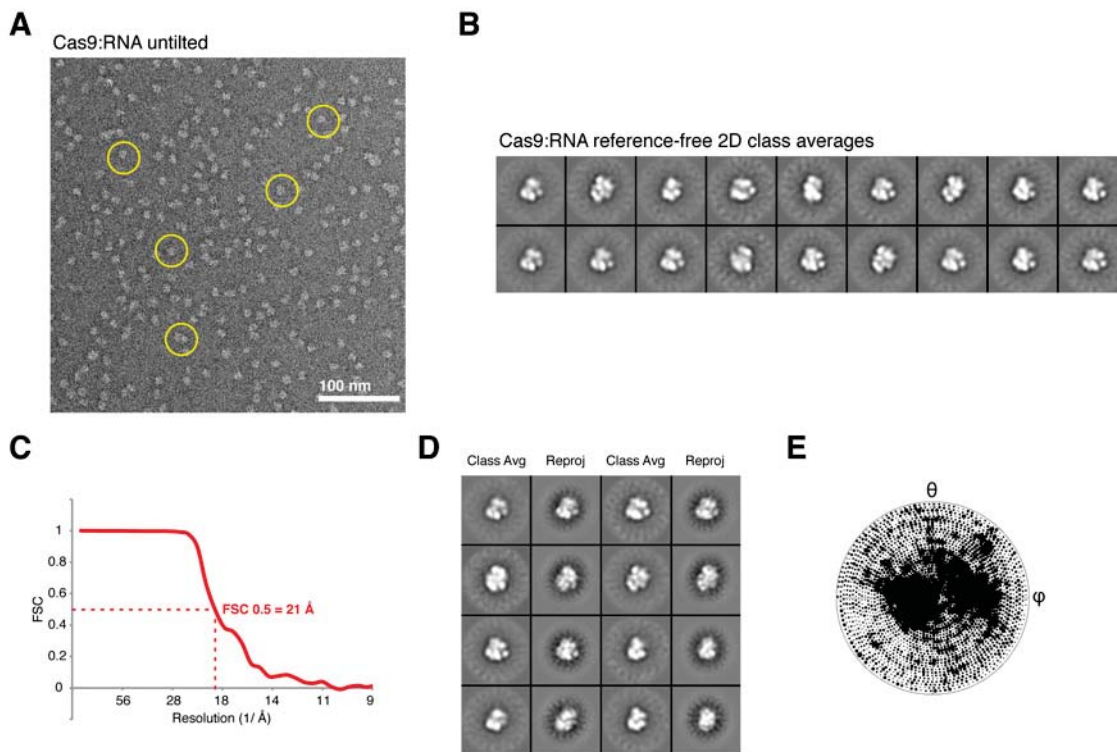

**Figure S19. Molecular architecture of SpyCas9:RNA.** (A) Representative untilted micrograph of negatively stained SpyCas9:RNA. Scale bar indicates 100 nm. (B) Reference-free 2D class averages of SpyCas9:RNA. The width of the boxes is  $\sim 316$  Å. (C) Fourier shell correlation (FSC) curve for the final reconstruction, showing the resolution to be  $\sim 21$  Å using the 0.5 FSC criterion. (D) Reference-free 2D class averages of SpyCas9:RNA (first and third columns) matched to reprojections of the final reconstruction (second and fourth columns). The width of the boxes is  $\sim 316$  Å. (E) Euler angle distribution for the final reconstruction.

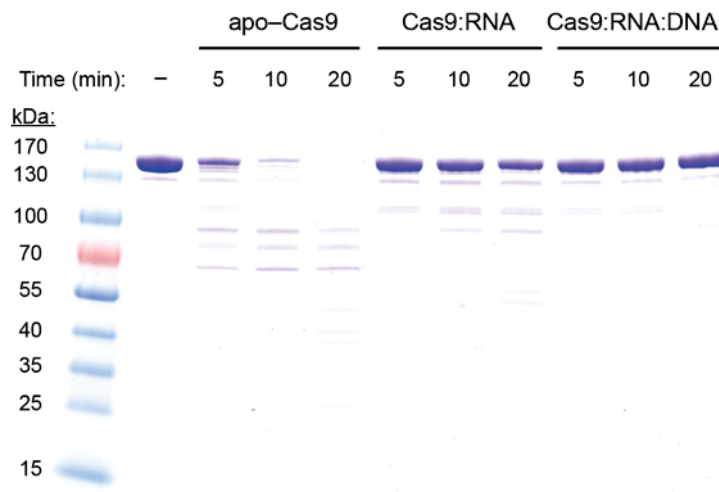

**Figure S20. Limited proteolysis of SpyCas9 with and without nucleic acid substrates suggests that nucleic acid-bound complexes adopt similar structural states.** Apo-SpyCas9, SpyCas9 bound to full-length crRNA and tracrRNA (SpyCas9:RNA), or RNA-programmed SpyCas9 in complex with target DNA (SpyCas9:RNA:DNA) were prepared at a concentration of 2.5  $\mu$ M and incubated with 2 ng/ $\mu$ l trypsin at 37 °C for the indicated time before quenching with 2X SDS gel-loading buffer. Samples were resolved by SDS-PAGE on a 4-20% gradient polyacrylamide gel (Bio-Rad). Apo-SpyCas9 is rapidly proteolyzed, whereas both SpyCas9:RNA and SpyCas9:RNA:DNA complexes are resistant to digestion by trypsin, suggesting that SpyCas9 undergoes similar structural rearrangements in both cases that mitigate proteolysis. Complexes were prepared with catalytically inactive D10A/H840A-SpyCas9 under the same conditions used to prepare samples for electron microscopy imaging.

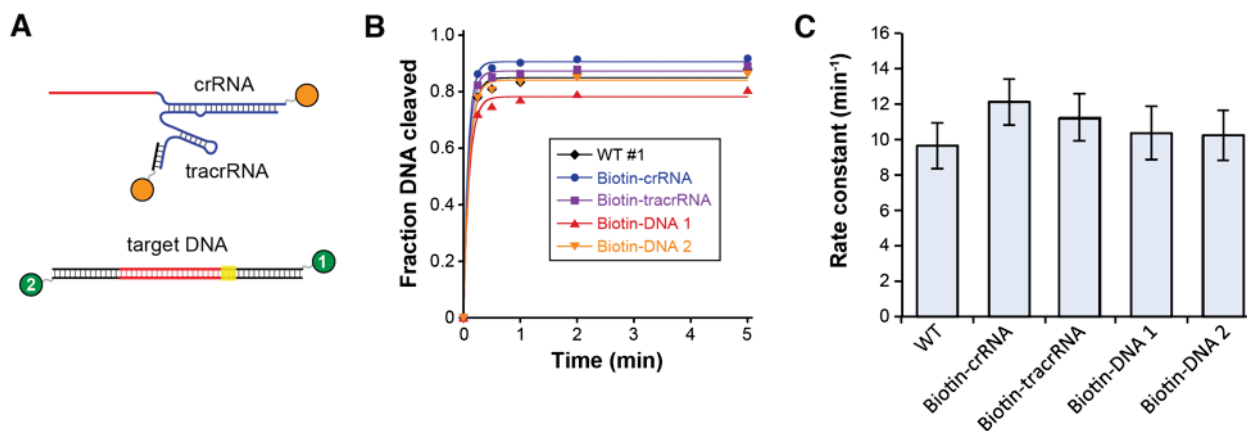

**Figure S21. Activity assays with biotin-RNA and biotin-DNA substrates used in streptavidin labeling experiments.** (A) Schematic depicting the attachment of biotin (orange and green circles) to each nucleic acid substrate. Note that the crRNA and each strand of the DNA target are covalently linked to biotin at their 3' ends, whereas tracrRNA is hybridized to a short biotinylated DNA oligonucleotide at its 3' end. (B) DNA cleavage assays were conducted with biotin-labeled nucleic acids to verify that the modification does not perturb DNA recognition and cleavage. Data from representative time courses were plotted and fit with single-exponentials (solid line) to yield first-order rate constants for the DNA cleavage reaction. Note that the steep part of the curve (<15 seconds) could not be well defined due to the rapid reaction rate, limiting the accuracy of these measurements. (C) Three independent DNA cleavage time courses were conducted for each SpyCas9 construct, and the averaged rate constants are shown in the bar graph. The fitting error for individual single-exponential fits was greater than the standard deviation in rate constants between independent replicates, and so error bars represent the fitting error averaged from three independent experiments.



**Table S1. Highest cross-correlation coefficients (CCC) obtained by docking the apo-SpyCas9 alpha-helical domain crystal structure as a rigid body into the apo-SpyCas9 and spyCas9:RNA:DNA EM-derived alpha-helical lobes using SITUS.**

|                                                           | apo-SpyCas9 EM density |                                      | SpyCas9:RNA:DNA EM density |                                      |
|-----------------------------------------------------------|------------------------|--------------------------------------|----------------------------|--------------------------------------|
|                                                           | $\alpha$ -helical lobe | $\alpha$ -helical lobe opposite hand | $\alpha$ -helical lobe     | $\alpha$ -helical lobe opposite hand |
| <b><math>\alpha</math>-helical lobe crystal structure</b> | 0.74                   | 0.70                                 | 0.83                       | 0.74                                 |

**Table S2. List of nucleic acid reagents used in this study**

| #  | Description                                                                                | Sequence (5'-3')                                                                                                |
|----|--------------------------------------------------------------------------------------------|-----------------------------------------------------------------------------------------------------------------|
| 1  | tracrRNA (nts 15-87)                                                                       | GGACAGCAUAGCAAGUUAUUUUUUAAGGCUAGUCCGUUAUCAACUUGAAAAAGUGGCA<br>CCGAGUCGGUGCUUUUUU                                |
| 2  | Targeting crRNA                                                                            | GUGAUAAAGUGGAAUGCCAUGGUUUUAGAGCUAUGCUGUUUUUG                                                                    |
| 3  | 55-bp DNA substrate,<br>non-target strand <sup>a</sup>                                     | GAGTGGAAAGGATGCCA <b>GTGATAAGTGGAAATGCCATG</b> <u>TGGGCTGTCAAAATTGAGC</u>                                       |
| 4  | 55-bp DNA substrate,<br>target strand <sup>a</sup>                                         | GCTCAATTTTGGACAGCCCA <b>CATGGCATTCCACTTATCAC</b> TGGCATCCTTCCACTC                                               |
| 5  | Br-dU <sub>1</sub> containing 55 nt DNA<br>substrate, non-target strand <sup>a</sup>       | GAGTGGAAAGGATGCCA <b>GTGATAAGTGGAAATGCCATG</b> (Br-<br>dU <sub>1</sub> ) <u>GGGCTGTCAAAATTGAGC</u>              |
| 6  | Br-dU <sub>2</sub> containing 55 nt DNA<br>substrate, target strand <sup>a</sup>           | GCTCAATTTTGGACAGCCC (Br-<br>dU <sub>2</sub> ) <b>CATGGCATTCCACTTATCAC</b> TGGCATCCTTCCACTC                      |
| 7  | reverse complement for # 6 <sup>a</sup>                                                    | GAGTGGAAAGGATGCCA <b>GTGATAAGTGGAAATGCCATG</b> <u>AGGGCTGTCAAAATTGAGC</u>                                       |
| 8  | Br-dU <sub>3</sub> containing 55 nt DNA<br>substrate, non-target strand <sup>a</sup>       | GAGTGGAAAGGATGCCA <b>GTGATAAGTGGAAATGCCATG</b> <u>TGG</u> (Br-<br>dU <sub>3</sub> ) <u>CTGTCAAAATTGAGC</u>      |
| 9  | reverse complement for #8 <sup>a</sup>                                                     | GCTCAATTTTGGACAGACCA <b>CATGGCATTCCACTTATCAC</b> TGGCATCCTTCCACTC                                               |
| 10 | tracrRNA_ext <sup>b</sup>                                                                  | GGACAGCAUAGCAAGUUAUUUUUUAAGGCUAGUCCGUUAUCAACUUGAAAAAGUGGCACCGAGUC<br>GGUGCUUUUUUUGCUCGUGCGC                     |
| 11 | Biotinylated DNA oligo to<br>hybridize to tracrRNA_ext <sup>b</sup>                        | Biotin-TTGCGCACGAGCAA                                                                                           |
| 12 | Non-targeting crRNA (control,<br>Fig. 7b)                                                  | GACGCAUAAAGAUGAGACGCGUUUUAGAGCUAUGCUGUUUUUG                                                                     |
| 13 | 3'-Biotinylated DNA, non-<br>target strand <sup>c</sup>                                    | GAGTGGAAAGGATGCCA <b>GTGATAAGTGGAAATGCCATG</b> <u>TGGGCTGTCAAAATTGAGC</u> -Biotin                               |
| 14 | 3'-Biotinylated DNA, target<br>strand <sup>c</sup>                                         | GCTCAATTTTGGACAGCCCA <b>CATGGCATTCCACTTATCAC</b> TGGCATCCTTCCACTC-Biotin                                        |
| 15 | ssDNA template for<br>transcribing tracrRNA <sup>c</sup>                                   | AAAAAGCACCGACTCGGTGCCACTTTTTCAAGTTGATAACGGACTAGCCTTATTTTAACTTGC<br>TATGCTGT <b>CCTATAGTGAGTCGTATTA</b>          |
| 16 | ssDNA template for<br>transcribing tracrRNA_ext <sup>c</sup>                               | GCGCAGGCAAAAAAAGCACCGACTCGGTGCCACTTTTTCAAGTTGATAACGGACTAGCCTT<br>ATTTTAACTTGTATGCTGT <b>CCTATAGTGAGTCGTATTA</b> |
| 17 | Oligo for preparing double-<br>stranded T7 promoters for <i>in<br/>vitro</i> transcription | TAATACGACTCACTATA                                                                                               |

<sup>a</sup> The protospacer is depicted in red. The PAM is underlined.

<sup>b</sup> Nucleotides hybridizing between the tracrRNA\_ext and biotin-DNA oligo are in blue.

<sup>c</sup> The reverse complement of the T7 promoter is indicated in **bold**.

## Supplementary References

1. B. Wiedenheft, S. H. Sternberg, J. A. Doudna, *Nature* **482**, 331–338 (2012).
2. S. Al-Attar, E. R. Westra, J. van der Oost, S. J. J. Brouns, *Biol. Chem.* **392**, 277–289 (2011).
3. M. P. Terns, R. M. Terns, *Curr Opin Microbiol* **14**, 321–327 (2011).
4. R. Sorek, C. M. Lawrence, B. Wiedenheft, *Annu Rev Biochem* **82**, 237–266 (2013).
5. R. Barrangou *et al.*, *Science* **315**, 1709–1712 (2007).
6. S. J. J. Brouns *et al.*, *Science* **321**, 960–964 (2008).
7. K. S. Makarova *et al.*, *Nat Rev Microbiol* **9**, 467–477 (2011).
8. M. Jinek *et al.*, *Science* **337**, 816–821 (2012).
9. T. Karvelis *et al.*, *RNA biology* **10** (2013).
10. G. Gasiunas, R. Barrangou, P. Horvath, V. Siksnys, *Proc Natl Acad Sci US A* **109**, E2579–86 (2012).
11. T. R. Sampson, S. D. Saroj, A. C. Llewellyn, Y.-L. Tzeng, D. S. Weiss, *Nature*, 1–5 (2013).
12. K. S. Makarova, L. Aravind, Y. I. Wolf, E. V. Koonin, *Biol Direct* **6**, 38 (2011).
13. K. Chylinski, A. Le Rhun, E. Charpentier, *RNA biology* **10**, 726–737 (2013).
14. P. Mali, K. M. Esvelt, G. M. Church, *Nat Methods* **10**, 957–963 (2013).
15. P. Mali *et al.*, *Science* **339**, 823–826 (2013).
16. L. Cong *et al.*, *Science* **339**, 819–823 (2013).
17. M. Jinek *et al.*, *elife* **2**, e00471 (2013).
18. L. S. Qi *et al.*, *Cell* **152**, 1173–1183 (2013).
19. L. A. Gilbert *et al.*, *Cell* **154**, 442–451 (2013).
20. P. Mali *et al.*, *Nat Biotechnol* (2013), doi:10.1038/nbt.2675.
21. Z. Hou *et al.*, *Proc Natl Acad Sci US A* (2013), doi:10.1073/pnas.1313587110.
22. K. M. Esvelt *et al.*, *Nat Methods* (2013), doi:10.1038/nmeth.2681.
23. J. M. Berger, S. J. Gamblin, S. C. Harrison, J. C. Wang, *Nature* **379**, 225–232 (1996).
24. R. Sapranauskas *et al.*, *Nucleic Acids Res* **39**, 9275–9282 (2011).

25. J. E. Garneau *et al.*, *Nature* **468**, 67–71 (2010).
26. Y. Zhang *et al.*, *Mol Cell* **50**, 488–503 (2013).
27. I. Fonfara *et al.*, *Nucleic Acids Res* (2013), doi:10.1093/nar/gkt1074.
28. K. M. Górecka, W. Komorowska, M. Nowotny, *Nucleic Acids Res* (2013), doi:10.1093/nar/gkt769.
29. W. Yang, *Nat Struct Mol Biol* **15**, 1228–1231 (2008).
30. W. Yang, *Quart. Rev. Biophys.* **44**, 1–93 (2011).
31. W. Yang, J. Y. Lee, M. Nowotny, *Mol Cell* **22**, 5–13 (2006).
32. I. Ivančić Baće, J. A. L. Howard, E. L. Bolt, *J Mol Biol* **422**, 607–616 (2012).
33. B. W. Shen, M. Landthaler, D. A. Shub, B. L. Stoddard, *J Mol Biol* **342**, 43–56 (2004).
34. M. Radermacher, T. Wagenknecht, A. Verschoor, J. Frank, *J Microsc* **146**, 113–136 (1987).
35. P. Chacón, W. Wriggers, *J Mol Biol* **317**, 375–384 (2002).
36. M. M. Jore *et al.*, *Nat Struct Mol Biol* **18**, 529–536 (2011).
37. C.-G. Yang *et al.*, *Nature* **452**, 961–965 (2008).
38. Y. Qi *et al.*, *Nature* **462**, 762–766 (2009).
39. C. M. Crenshaw *et al.*, *Journal of Biological Chemistry* **287**, 24916–24928 (2012).
40. J. Song, O. Rechko, T. H. Bestor, D. J. Patel, *Science* **331**, 1036–1040 (2011).
41. D. G. Sashital, B. Wiedenheft, J. A. Doudna, *Mol Cell* **46**, 606–615 (2012).
42. E. Semenova, M. Nagornykh, M. Pyatnitskiy, I. I. Artamonova, K. Severinov, *FEMS Microbiol. Lett.* **296**, 110–116 (2009).
43. E. Semenova *et al.*, *Proc Natl Acad Sci US A* **108**, 10098–10103 (2011).
44. B. Wiedenheft *et al.*, *Nature* **477**, 486–489 (2011).
45. R. H. J. Staals *et al.*, *Mol Cell* **52**, 135–145 (2013).
46. C. Rouillon *et al.*, *Mol Cell* **52**, 124–134 (2013).
47. M. Spilman *et al.*, *Mol Cell* **52**, 146–152 (2013).
48. T. Sinkunas *et al.*, *EMBO J* **32**, 385–394 (2013).
49. W. Kabsch, *Acta Crystallogr D Biol Crystallogr* **66**, 125–132 (2010).

50. C. Vornrhein, E. Blanc, P. Roversi, G. Bricogne, *Methods Mol Biol* **364**, 215–230 (2007).
51. T. Terwilliger, *J Synchrotron Radiat* **11**, 49–52 (2004).
52. P. Emsley, P. Emsley, K. Cowtan, K. Cowtan, *Acta Crystallogr D Biol Crystallogr* **60**, 2126–2132 (2004).
53. P. V. Afonine *et al.*, *Acta Crystallogr D Biol Crystallogr* **68**, 352–367 (2012).
54. H. R. Powell, O. Johnson, A. G. W. Leslie, *Acta Crystallogr D Biol Crystallogr* **69**, 1195–1203 (2013).
55. P. Evans, *Acta Crystallogr D Biol Crystallogr* **62**, 72–82 (2006).
56. G. N. Murshudov, A. A. Vagin, E. J. Dodson, *Acta Crystallogr D Biol Crystallogr* **53**, 240–255 (1997).
57. C. Suloway *et al.*, *J Struct Biol* **151**, 41–60 (2005).
58. M. Hohn *et al.*, *J Struct Biol* **157**, 47–55 (2007).
59. G. Tang *et al.*, *J Struct Biol* **157**, 38–46 (2007).
60. N. A. Baker, D. Sept, S. Joseph, M. J. Holst, J. A. McCammon, *Proc Natl Acad Sci USA* **98**, 10037–10041 (2001).
61. H. Ashkenazy, E. Erez, E. Martz, T. Pupko, N. Ben-Tal, *Nucleic Acids Res* **38**, W529–33 (2010).
62. B. Wiedenheft *et al.*, *Structure* **17**, 904–912 (2009).
63. T. R. Schneider, G. M. Sheldrick, *Acta Crystallogr D Biol Crystallogr* **58**, 1772–1779 (2002).
64. P. D. Adams *et al.*, *Acta Crystallogr D Biol Crystallogr* **66**, 213–221 (2010).
65. P. Emsley, B. Lohkamp, W. G. Scott, K. Cowtan, *Acta Crystallogr D Biol Crystallogr* **66**, 486–501 (2010).
66. I. W. Davis *et al.*, *Nucleic Acids Res* **35**, W375–83 (2007).
67. P. Roepstorff, J. Fohlman, *Biomed. Mass Spectrom.* **11**, 601 (1984).
68. P. H. Zwart *et al.*, *Methods Mol Biol* **426**, 419–435 (2008).
69. A. J. McCoy *et al.*, *J Appl Crystallogr* **40**, 658–674 (2007).
70. S. P. Mallick, B. Carragher, C. S. Potter, D. J. Kriegman, *Ultramicroscopy* **104**, 8–29 (2005).
71. A. M. Roseman, *J Struct Biol* **145**, 91–99 (2004).

72. S. H. W. Scheres, R. Núñez-Ramírez, C. O. S. Sorzano, J. M. Carazo, R. Marabini, *Nat Protoc* **3**, 977–990 (2008).
73. N. R. Voss *et al.*, *J Struct Biol* **169**, 389–398 (2010).
74. G. C. Lander *et al.*, *J Struct Biol* **166**, 95–102 (2009).
75. N. R. Voss, C. K. Yoshioka, M. Radermacher, C. S. Potter, B. Carragher, *J Struct Biol* **166**, 205–213 (2009).
76. M. van Heel, G. Harauz, E. V. Orlova, R. Schmidt, M. Schatz, *J Struct Biol* **116**, 17–24 (1996).
77. J. Frank *et al.*, *J Struct Biol* **116**, 190–199 (1996).
78. B. Wiedenheft *et al.*, *Proc Natl Acad Sci US A* **108**, 10092–10097 (2011).
79. S. J. Ludtke, P. R. Baldwin, W. Chiu, *J Struct Biol* **128**, 82–97 (1999).
80. E. F. Pettersen *et al.*, *J Comput Chem* **25**, 1605–1612 (2004).
81. G. D. Pintilie, J. Zhang, T. D. Goddard, W. Chiu, D. C. Gossard, *J Struct Biol* **170**, 427–438 (2010).
82. K. Katoh, D. M. Standley, *Methods Mol Biol* **1079**, 131–146 (2014).
83. P. Gouet, E. Courcelle, D. I. Stuart, F. Métoz, *Bioinformatics* **15**, 305–308 (1999).
84. L. Holm, C. Sander, *Trends Biochem Sci* **20**, 478–480 (1995).
85. M. A. Larkin *et al.*, *Bioinformatics* **23**, 2947–2948 (2007).
86. W. Wriggers, S. Birmanns, *J Struct Biol* **133**, 193–202 (2001).
